# Supplementary material for: Group Pregnancy Care for refugee background women: a codesigned, multimethod evaluation protocol applying a community engagement framework and an interrupted time series design
Source: PubMed Central journal article supplement — BMJ Open. 2021 Jul 19;11(7):e048271. doi: 10.1136/bmjopen-2020-048271 (PMC8291298; doi:10.1136/bmjopen-2020-048271), 2021-07-19
Supplement: bmjopen-2020-048271.draft_revisions.pdf [file bmjopen-2020-048271.draft_revisions.pdf]

# BMJ Open

BMJ Open is committed to open peer review. As part of this commitment we make the peer review history of every article we publish publicly available.

When an article is published we post the peer reviewers' comments and the authors' responses online. We also post the versions of the paper that were used during peer review. These are the versions that the peer review comments apply to.

The versions of the paper that follow are the versions that were submitted during the peer review process. They are not the versions of record or the final published versions. They should not be cited or distributed as the published version of this manuscript.

BMJ Open is an open access journal and the full, final, typeset and author-corrected version of record of the manuscript is available on our site with no access controls, subscription charges or pay-per-view fees (<http://bmjopen.bmj.com>).

If you have any questions on BMJ Open's open peer review process please email [info.bmjopen@bmj.com](mailto:info.bmjopen@bmj.com)

# BMJ Open

## Group Pregnancy Care for refugee background women: a co-designed, multi-method evaluation protocol applying a community engagement framework and an interrupted time series design

|                               |                                                                                                                                                                                                                                                                                                                                                                                                                                                                                                                                                                                                                                                                                                                                                                                                                                                                                                                                                                                                                                                                                                                                                                                                                                                                                                                                                                                                                                                                                                                                                                                                                                                                                                                                                                                                                  |
|-------------------------------|------------------------------------------------------------------------------------------------------------------------------------------------------------------------------------------------------------------------------------------------------------------------------------------------------------------------------------------------------------------------------------------------------------------------------------------------------------------------------------------------------------------------------------------------------------------------------------------------------------------------------------------------------------------------------------------------------------------------------------------------------------------------------------------------------------------------------------------------------------------------------------------------------------------------------------------------------------------------------------------------------------------------------------------------------------------------------------------------------------------------------------------------------------------------------------------------------------------------------------------------------------------------------------------------------------------------------------------------------------------------------------------------------------------------------------------------------------------------------------------------------------------------------------------------------------------------------------------------------------------------------------------------------------------------------------------------------------------------------------------------------------------------------------------------------------------|
| Journal:                      | <i>BMJ Open</i>                                                                                                                                                                                                                                                                                                                                                                                                                                                                                                                                                                                                                                                                                                                                                                                                                                                                                                                                                                                                                                                                                                                                                                                                                                                                                                                                                                                                                                                                                                                                                                                                                                                                                                                                                                                                  |
| Manuscript ID                 | bmjopen-2020-048271                                                                                                                                                                                                                                                                                                                                                                                                                                                                                                                                                                                                                                                                                                                                                                                                                                                                                                                                                                                                                                                                                                                                                                                                                                                                                                                                                                                                                                                                                                                                                                                                                                                                                                                                                                                              |
| Article Type:                 | Protocol                                                                                                                                                                                                                                                                                                                                                                                                                                                                                                                                                                                                                                                                                                                                                                                                                                                                                                                                                                                                                                                                                                                                                                                                                                                                                                                                                                                                                                                                                                                                                                                                                                                                                                                                                                                                         |
| Date Submitted by the Author: | 23-Dec-2020                                                                                                                                                                                                                                                                                                                                                                                                                                                                                                                                                                                                                                                                                                                                                                                                                                                                                                                                                                                                                                                                                                                                                                                                                                                                                                                                                                                                                                                                                                                                                                                                                                                                                                                                                                                                      |
| Complete List of Authors:     | <p>Riggs, Elisha; Murdoch Childrens Research Institute, Intergenerational Health; The University of Melbourne, Department of General Practice<br/> Yelland, Jane; Murdoch Childrens Research Institute, Intergenerational Health; The University of Melbourne, Department of General Practice<br/> Mensah, Fiona; Murdoch Childrens Research Institute, Intergenerational Health; The University of Melbourne, Department of Paediatrics<br/> Gold, Lisa; Deakin University, Deakin Health Economics; Murdoch Children's Research Institute, Population Health<br/> szwarc, Josef; Victorian Foundation for Survivors of Torture<br/> Kaplan, Ida ; Victorian Foundation for Survivors of Torture<br/> Small, Rhonda; La Trobe University, Judith Lumely Centre; Karolinska Institute, Department of Women's and Children's Health, Division of Reproductive Health<br/> Middleton, Philippa; South Australian Health and Medical Research Institute; The University of Adelaide, Faculty of Medical and Health Sciences<br/> Krastev, Ann; Murdoch Childrens Research Institute, Intergenerational Health<br/> Mcdonald, E; Murdoch Childrens Research Institute, Intergenerational Health<br/> East, Christine ; La Trobe University, School of Nursing and Midwifery/Mercy Hospital for Women<br/> Homer, Caroline ; Burnet Institute, Maternal, Child and Adolescent Health Program<br/> Nesvadba , Natalija; Mercy Hospitals Victoria Ltd<br/> Biggs, Laura; Murdoch Childrens Research Institute, Intergenerational Health<br/> Braithwaite, Jeffrey; Macquarie University, Australian Institute of Health Innovation<br/> Brown, Stephanie; Murdoch Childrens Research Institute, Intergenerational Health; The University of Melbourne, Department of General Practice and Department of Paediatrics</p> |
| Keywords:                     | Quality in health care < HEALTH SERVICES ADMINISTRATION & MANAGEMENT, PUBLIC HEALTH, Community child health < PAEDIATRICS                                                                                                                                                                                                                                                                                                                                                                                                                                                                                                                                                                                                                                                                                                                                                                                                                                                                                                                                                                                                                                                                                                                                                                                                                                                                                                                                                                                                                                                                                                                                                                                                                                                                                        |
|                               |                                                                                                                                                                                                                                                                                                                                                                                                                                                                                                                                                                                                                                                                                                                                                                                                                                                                                                                                                                                                                                                                                                                                                                                                                                                                                                                                                                                                                                                                                                                                                                                                                                                                                                                                                                                                                  |

1  
2  
3  
4  
5  
6  
7  
8  
9  
10  
11  
12  
13  
14  
15  
16  
17  
18  
19  
20  
21  
22  
23  
24  
25  
26  
27  
28  
29  
30  
31  
32  
33  
34  
35  
36  
37  
38  
39  
40  
41  
42  
43  
44  
45  
46  
47  
48  
49  
50  
51  
52  
53  
54  
55  
56  
57  
58  
59  
60

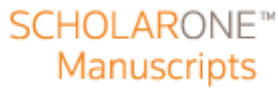

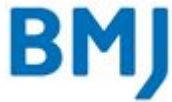

I, the Submitting Author has the right to grant and does grant on behalf of all authors of the Work (as defined in the below author licence), an exclusive licence and/or a non-exclusive licence for contributions from authors who are: i) UK Crown employees; ii) where BMJ has agreed a CC-BY licence shall apply, and/or iii) in accordance with the terms applicable for US Federal Government officers or employees acting as part of their official duties; on a worldwide, perpetual, irrevocable, royalty-free basis to BMJ Publishing Group Ltd ("BMJ") its licensees and where the relevant Journal is co-owned by BMJ to the co-owners of the Journal, to publish the Work in this journal and any other BMJ products and to exploit all rights, as set out in our [licence](#).

The Submitting Author accepts and understands that any supply made under these terms is made by BMJ to the Submitting Author unless you are acting as an employee on behalf of your employer or a postgraduate student of an affiliated institution which is paying any applicable article publishing charge ("APC") for Open Access articles. Where the Submitting Author wishes to make the Work available on an Open Access basis (and intends to pay the relevant APC), the terms of reuse of such Open Access shall be governed by a Creative Commons licence – details of these licences and which [Creative Commons](#) licence will apply to this Work are set out in our licence referred to above.

Other than as permitted in any relevant BMJ Author's Self Archiving Policies, I confirm this Work has not been accepted for publication elsewhere, is not being considered for publication elsewhere and does not duplicate material already published. I confirm all authors consent to publication of this Work and authorise the granting of this licence.

1  
2  
3  
4  
5  
6  
7  
8  
9  
10  
11  
12  
13  
14  
15  
16  
17  
18  
19  
20  
21  
22  
23  
24  
25  
26  
27  
28  
29  
30  
31  
32  
33  
34  
35  
36  
37  
38  
39  
40  
41  
42  
43  
44  
45  
46  
47  
48  
49  
50  
51  
52  
53  
54  
55  
56  
57  
58  
59  
60

**Group Pregnancy Care for refugee background women: a co-designed, multi-method evaluation protocol applying a community engagement framework and an interrupted time series design**

Elisha Riggs,<sup>1,2</sup> Jane Yelland,<sup>1,2</sup> Fiona Mensah,<sup>1,3</sup> Lisa Gold,<sup>4,5</sup> Josef Szwarc,<sup>6</sup> Ida Kaplan,<sup>6</sup> Rhonda Small,<sup>7,8</sup> Philippa Middleton<sup>9,10</sup> Ann Krastev,<sup>1</sup> Ellie McDonald,<sup>1</sup> Christine East,<sup>11</sup> Caroline Homer,<sup>12</sup> Natalija Nesvadba,<sup>13</sup> Laura Biggs,<sup>1</sup> Jeffrey Braithwaite,<sup>14</sup> Stephanie J Brown<sup>1, 2, 3, 9</sup>

1 Intergenerational Health, Murdoch Children's Research Institute, Parkville, Victoria Australia

2 Department of General Practice, The University of Melbourne, Carlton, Victoria, Australia

3 Department of Paediatrics, Parkville, The University of Melbourne, Victoria Australia

4 Deakin Health Economics, Institute for Health Transformation, School of Health and Social Development, Faculty of Health, Deakin University, Burwood, Victoria, Australia

5 Population Health, Murdoch Children's Research Institute, Parkville, Victoria Australia

6 The Victorian Foundation for the Survivors of Trauma, Brunswick, Victoria, Australia

7 Judith Lumely Centre, La Trobe University, Bundoora, Victoria, Australia

8 Department of Women's and Children's Health, Division of Reproductive Health, Karolinska Institute, Stockholm, Sweden

9 South Australian Health and Medical Research Institute, Women and Children's Hospital Adelaide, South Australia, Australia

10 Faculty of Medical and Health Sciences, The University of Adelaide, Adelaide, South Australia, Australia.

11 School of Nursing and Midwifery, La Trobe University/Mercy Hospital for Women, Bundoora, Victoria, Australia

12 Maternal, Child and Adolescent Health Program, Burnet Institute, Melbourne, Victoria, Australia

13 Mercy Hospitals Victoria Ltd, Werribee, Victoria, Australia

14 Australian Institute of Health Innovation, Centre for Healthcare Resilience and Implementation Science, Macquarie University, New South Wales, Australia

**Corresponding author:** Elisha Riggs, Intergenerational Health, Murdoch Children's Research Institute, Flemington Road, Parkville VIC Australia 3052 E: [elisha.riggs@mcri.edu.au](mailto:elisha.riggs@mcri.edu.au)

**Word count:** 5330

1  
2  
3 **Key words:** healthcare, public health, community child health, group pregnancy care, refugee,  
4 interrupted time series, community engagement, evaluation,  
5  
6  
7  
8  
9  
10  
11  
12  
13  
14  
15  
16  
17  
18  
19  
20  
21  
22  
23  
24  
25  
26  
27  
28  
29  
30  
31  
32  
33  
34  
35  
36  
37  
38  
39  
40  
41  
42  
43  
44  
45  
46  
47  
48  
49  
50  
51  
52  
53  
54  
55  
56  
57  
58  
59  
60

## Abstract

**Introduction** Pregnancy and early parenthood are key opportunities for interaction with health services and connecting to other families at the same life stage. Public antenatal care should be accessible to all, however barriers persist for families from refugee communities to access, navigate and optimise health care during pregnancy. Group Pregnancy Care is an innovative model of care co-designed with a community from a refugee background and other key stakeholders. Group Pregnancy Care aims to provide a culturally safe and supportive environment for women to participate in antenatal care in a language they understand, to improve health literacy and promote social connections and inclusion. This paper outlines the Group Pregnancy Care program and provides details of the evaluation framework.

**Methods and analysis** This is a multi-site, multi-phase, quasi-experimental study using community-based participatory research methods and an interrupted time series design to evaluate a complex intervention. Process and cost effectiveness measures will be incorporated into quality improvement cycles. Evaluation measures are underpinned by partnerships, community engagement and capacity building.

**Ethics and dissemination** Ethics and dissemination protocols are informed by co-design and participatory principles. All measures are piloted to refine research processes and ensure appropriateness and meaningfulness to community members, bicultural researchers and partners.

### Strengths and limitations of this study

- The study's conceptual framework is underpinned by recognition of the diverse experiences of families of refugee background and the need for trauma informed approaches in health care and research
- Comprehensive, multi-method evaluation framework including interrupted time series, process measures and cost effectiveness
- Partnerships and community engagement set the foundation for co-design of the study methods
- Capacity building and employment of refugee background staff is central to the conduct of the evaluation to enable community support for the study and women's participation
- Staffing and resource constraints coupled with the COVID-19 pandemic have limited the capacity of health services to implement the intervention and hampered the evaluation as planned

## Introduction

Women from refugee backgrounds giving birth in Australia have high rates of stillbirth and perinatal mortality.<sup>1,2</sup> These women also have a high risk of physical, mental and social health problems related to experiences of hardship, stress, and experience of persistent disadvantage in the high-income countries in which they settle.<sup>3-5</sup> The loss of family members through death, detention or separation is common, with pervasive and long term consequences for mental health, family functioning and social cohesion.<sup>6,7</sup> In addition, the psychological and social impacts of torture and other traumatic events can often be experienced intergenerationally.<sup>7-9</sup> This is particularly significant given the accumulating evidence that exposure to stress and trauma preceding, during, and after pregnancy contributes to a range of adverse outcomes (for example infants born preterm, small for gestational age or with low birthweight), with the potential to affect health across the life course.<sup>8-15</sup>

The provision of effective high quality care during pregnancy is critical for healthy mothers and babies.<sup>16</sup> In this paper, we outline the evaluation framework for an innovative model of Group Pregnancy Care (GPC) for women of refugee background that is currently being implemented in Melbourne, Australia. Group Pregnancy Care aims to provide a culturally safe and supportive environment for women to actively participate in their health care.<sup>17</sup> The program aims to improve maternal and child health outcomes by increasing engagement with antenatal care, providing early postnatal care, overcoming language and health literacy barriers and decreasing social isolation.

The United Nations estimates there are approximately 70 million forcibly displaced people globally.<sup>18</sup> Each year, the Australian Government sets the number of visas that may be granted to those in humanitarian need. This quota has been around 13,750 places annually, with some variation. In 2017, an additional 12,000 places were provided for people displaced from Syria and Iraq. In the state of Victoria, Australia, 40% of all women giving birth are born overseas, with the majority of migrant women coming from a country where English is not the main language.<sup>19</sup> This equates to over 31,000 women of non-English speaking background giving birth in Victoria each year. In Victoria's largest metropolitan maternity hospitals around 10% of all women giving birth are of refugee background.<sup>20</sup>

Well provided pregnancy care should provide an opportunity to identify and attend to potentially modifiable social risk factors (e.g. social isolation, stress, trauma, low health literacy, family violence, smoking).<sup>21-26</sup> However the evidence regarding the effectiveness of antenatal interventions addressing social risk factors is mixed. For example, Kiely et al found that a relatively brief psychosocial intervention in pregnancy resulted in a reduction of intimate partner violence (IPV) and improved pregnancy outcomes among African-American women.<sup>27</sup> In contrast, a systematic review pooling evidence from nine Randomised Controlled Trials (RCTs) evaluating pregnancy interventions for IPV concluded that stronger, high quality research evidence is needed to clarify which interventions should be adopted.<sup>28</sup>

Families of refugee background encounter significant barriers accessing and utilising public maternity services and early maternal and child health services.<sup>29,30</sup> Within these systems of care, failure to identify and address clinical and social risks for poor maternal and infant outcomes places mothers and unborn babies at significant risk of adverse outcomes.<sup>16,31</sup> Supporting women to develop health literacy by tailoring antenatal and postnatal care to



1  
2  
3 address their specific needs for information and build social connections for support has been  
4 shown to improve both health care access and engagement, and to enhance women's ability  
5 to make health decisions for themselves and their children.<sup>32-34</sup>  
6  
7

### 8 ***Group Pregnancy Care for women and their families from a refugee background***

9  
10 The World Health Organization identified Group Pregnancy Care as having the potential to  
11 meet the complex needs of populations vulnerable to poor outcomes,<sup>16</sup> with the Australian  
12 antenatal care guidelines identifying potential benefits to women from refugee  
13 backgrounds.<sup>35</sup> Group-based pregnancy models typically involve a midwife providing  
14 antenatal care and education to a number of women at the same time. The group setting  
15 provides an avenue for sharing information and developing supportive social networks. The  
16 premise of the model is that women learn best from each other's experience, with facilitated  
17 discussion focusing on what women want to know.  
18  
19

20 The evidence in this field is building, with studies indicating improvements in preterm birth  
21 and low birthweight,<sup>36</sup> maternal knowledge and patient satisfaction,<sup>37-39</sup> social support<sup>40</sup> and  
22 reduced costs of health care provision.<sup>41</sup> However, a Cochrane systematic review including  
23 four randomised and quasi-randomised controlled trials (n=2350, English speaking women)  
24 evaluating group antenatal care found no clear evidence of improvement in rates of preterm  
25 birth, low birthweight, small-for-gestational age infants or perinatal mortality comparing  
26 group based models of antenatal care with one to one antenatal care.<sup>42</sup> The authors  
27 concluded that the number of women included in the review was too small to provide  
28 adequate power for meaningful comparisons, and further research was needed. Since this  
29 review, there has been a rapid emergence of new evidence supporting group-based models  
30 of pregnancy care. A systematic review of group prenatal care in high-risk populations  
31 identified a range of improved outcomes for women identified as having a 'high-risk'  
32 pregnancy.<sup>43</sup> This included decreased preterm birth for low-income and African American  
33 women, increased care attendance for women with opioid addiction, adolescents and low-  
34 income groups. Other American studies involving African American and Medicaid (public  
35 health insurance in the USA) eligible women have identified a reduction in low birthweight,  
36 caesarean birth, low 5 minute Apgar scores, and neonatal intensive care unit admission for  
37 women who attended the group model compared to standard care.<sup>44-46</sup> However, none of  
38 these studies have specifically focussed on women from refugee backgrounds.  
39  
40  
41  
42  
43

### 44 ***Co-design and implementation of a new model of Group Pregnancy Care***

45  
46 All Australian residents have access to free pregnancy care at public hospitals, free care from  
47 public maternal and child health (and other community health) services, and subsidised care  
48 from community-based general practitioners and other medical providers through Australia's  
49 universal public health insurance scheme (Medicare).<sup>47</sup> Depending on visa type, some people  
50 from refugee backgrounds will be ineligible for Medicare.<sup>48</sup> Pregnancy care in Australia can  
51 be accessed in either the public or private sector. Public pregnancy care is offered through  
52 public hospital antenatal clinics or in shared care arrangements between a community-based  
53 general practitioner and hospital antenatal clinic. Most women in Australia give birth in a  
54 public hospital.  
55  
56  
57

58 The *Bridging the Gap Partnership* (2014-2016) co-designed and pilot tested a new model of  
59 Group Pregnancy Care for families of refugee background living in the outer western region  
60

of Melbourne, Australia.<sup>17</sup> This is the first program of its kind in Australia and involves inter-agency collaboration between public maternity hospitals, refugee support services and publicly funded maternal and child health (MCH) services.

The key program elements are outlined in Table 1. In brief, the model involves multifaceted, culturally appropriate preventive and health promoting health care, information and support for women of refugee background during and after pregnancy in a community setting. The model of care is delivered by a multidisciplinary team of five staff. Fortnightly group information sessions are co-facilitated by a midwife, MCH nurse and bicultural worker. Clinical antenatal care is provided by a second midwife and an on-site interpreter alongside the group sessions. The program is cost-free for clients; provides pregnancy care and information that is woman-directed, culturally appropriate and in women's language; and facilitates referrals, e.g. social work, housing services. Women can enrol to attend the fortnightly group information sessions at any stage of pregnancy.

**Table 1: Key program elements of the new model of *Group Pregnancy Care***

**Key elements:**

- local partnerships between public maternity hospitals, maternal and child health services and multicultural agencies. Partnership meetings are held quarterly and both managers and staff are invited to attend.
- community and stakeholder engagement in the co-design of each local program
- establishment of a multidisciplinary team including two midwives, a maternal and child health nurse, a professional interpreter and a community and language specific bicultural worker; with the same team delivering the program each session, with designated back-up staff available if needed.
- women invited to participate by general practice referral, hospital booking or through community networks
- women-directed group information sessions with women from early to late pregnancy, co-facilitated by a midwife, maternal and child health nurse and a bicultural worker
- pregnancy care (as per standard hospital schedule of visits) with a midwife and professional interpreter held at the same time as the group information session
- home visits by the same maternal and child health nurse and bicultural worker up to 4 months postpartum (if needed)
- locating the program in a community setting close to where families live (e.g. MCH centre)
- flexibility to embed the model in ways that work for communities and health services.

Figure 1 outlines the program logic for GPC. The program is underpinned by the trauma and recovery framework developed by the Victorian Foundation for the Survivors of Torture (Foundation House).<sup>49</sup> The family context and promoting positive outcomes for the whole family are central to the program. A fundamental premise of the program is that by creating culturally safe places for women to connect, access information and strengthen health literacy and self-efficacy, the program will contribute to improved birth and family health outcomes. We expect that should the program be able to change individual behaviors (e.g.

1  
2  
3 self-efficacy, health literacy) these determinants are on the pathway to improved birth and  
4 family health outcomes. We hypothesise that GPC will initially increase access and  
5 engagement with prenatal services (primary outcome for evaluation), and that subsequent  
6 changes in individual behaviors (e.g. self-efficacy, health literacy) will be determinants on the  
7 pathway to improved birth and family health outcomes.  
8  
9

10 [Insert Figure 1 about here]

11 A qualitative evaluation of the pilot program found that GPC provides a space for women to  
12 feel like they belong, connect with their community networks and find a sense of kinship,  
13 family and community in Melbourne.<sup>17</sup> A key finding was the pivotal role of the bicultural  
14 worker in leveraging her own community networks for women to find out about the program,  
15 and enabling trust and understanding between healthcare providers. The bicultural worker  
16 also played a valuable role building the knowledge and skills of other team members in  
17 culturally appropriate and sensitive ways of working with women and families of refugee  
18 background.<sup>46</sup> Based on the positive findings of this preliminary evaluation, the Victorian  
19 Government supported scale-up and a robust evaluation across several sites.  
20  
21  
22  
23

## 24 ***Scaling up Group Pregnancy Care***

### 25 ***Partnership and governance***

26 The Murdoch Children's Research Institute (MCRI) is the lead agency and oversees the  
27 program in partnership with Foundation House. Foundation House is the major state-wide  
28 provider of counselling and advocacy services for people of refugee background. A team of  
29 study investigators with expertise in refugee health, community engagement, perinatal  
30 mental health, midwifery, implementation science, biostatistics and health economics are  
31 responsible for the evaluation. Thirteen agencies have come together to enable the  
32 implementation and evaluation of Group Pregnancy Care, including: eight health services;  
33 two refugee agencies; and three Victorian government department and peak governmental  
34 bodies. In addition, Local Partnership Groups have been formed comprising key managers  
35 and staff from the services involved to oversee site-specific co-design and implementation.  
36  
37  
38  
39  
40  
41

### 42 ***Partnerships for sustainability***

43 The context for implementing and evaluating GPC is complex. The programs are all situated  
44 in large public hospitals with competing demands for acute care resources. The  
45 implementation of GPC requires substantial investment from all stakeholders into the  
46 partnership relationship. All aspects of design, system readiness and workforce development  
47 have been developed within the existing resources of each partner agency. The partner  
48 agencies have provided a substantial investment of time, energy and enthusiasm for trying  
49 out GPC to improve care and outcomes for refugee families. This approach was adopted as a  
50 strategy to support program sustainability within health services.  
51  
52  
53

54 Pressures on the health agencies taking part include rising birth rates and changing  
55 demographics (i.e. population growth, new refugee populations) in the regions served by  
56 participating hospitals, coupled with organisational restructuring and fluctuations in  
57 workforce supply. In addition, national and state refugee and asylum seeker health service  
58 eligibility policies compound the challenges for services in meeting the needs of women and  
59  
60

1  
2  
3 families newly arrived in Australia. Despite these systemic challenges, the investment in  
4 partnerships is anticipated to promote direct and sustained translation into practice.<sup>50</sup>  
5

### 6 ***GPC Program staffing***

7  
8 GPC staff (e.g. midwives, MCH nurses, bicultural workers, interpreters) have been identified  
9 by service managers or via internal Expression of Interest pathways. Bicultural workers were  
10 drawn from staff already employed by one of the partner agencies (Victorian Cooperative on  
11 Children's Services for Ethnic Groups, known as VICSEG New Futures). All GPC staff  
12 participated in tailored professional development provided by the Foundation House<sup>51</sup> and  
13 the Groupwork Centre.<sup>52</sup> Training included trauma-informed approaches to care,<sup>49</sup> skills  
14 development in group co-facilitation, creating group safety, self-care and reflective practice.  
15  
16

### 17 ***Communities participating in Group Pregnancy Care***

18  
19 The partner agencies committed to expanding the program with four refugee background  
20 communities: Karen (from Burma), Afghan, Assyrian Chaldean (from Iraq and Syria) and  
21 Vietnamese communities. Priority for these populations was based on:  
22

- 23 (i) evidence of poor maternal, perinatal and child health outcomes and under  
24 utilisation/lack of engagement with services (based on service data);
- 25 (ii) >100 births per annum in the country/language group at partner hospitals
- 26 (iii) social risks within communities as identified by partner agencies (access issues,  
27 isolation, family violence, low health literacy, requirement for interpreters)
- 28
- 29
- 30

31 Drawing on learnings from the pilot study, women are invited to participate in the program  
32 when they book in for pregnancy care or may be referred through community/social networks  
33 and other services (e.g. GP clinics).  
34  
35

### 36 ***Study Aims***

37  
38 The specific aims of the evaluation are to:

- 39 1. Evaluate the effectiveness of the GPC program in improving timely access and  
40 engagement with preventive health care
- 41 2. a) Identify program attributes (intensity, frequency, acceptability, sustainability) that are  
42 associated with health care access and engagement and improved maternal and child  
43 outcomes and b) monitor adverse maternal, perinatal and infant health outcomes of  
44 women participating in the GPC program.
- 45 3. Examine mothers' progression in health literacy, social and emotional well-being and  
46 experience of care associated with participation in the GPC program.
- 47 4. Estimate the potential cost-offsets from improved maternal and child health outcomes  
48 relative to the costs of implementing the program, and program cost-effectiveness.  
49  
50  
51  
52  
53  
54  
55  
56  
57  
58  
59  
60

## ***Patient and Public (community) Involvement***

### ***Community engagement and capacity building***

For the past nine years MCRI and Foundation House have been working in partnership to develop and implement a program of collaborative, community-based, participatory research with refugee families focusing on social health and wellbeing of the whole family. Our commitment to respect, reciprocity and capacity building are fundamental to the way in which this study has been designed. Community engagement is a key strategy for ensuring that services are responsive to the needs of the communities which they serve.

The employment of linguistically and culturally matched bicultural research staff and provision of mentoring and training to build research capacity are central to this study. Drawing upon the bicultural researchers' cultural knowledge, language skills and community networks is critical for establishing cultural safety.<sup>53</sup> These participatory strategies aim to alleviate the unequal relationships between researchers and research participants that characterize traditional research approaches.<sup>54</sup>

### ***Role of bicultural researchers***

In addition to the four bicultural staff appointed to work with GPC implementation teams, four bicultural researchers have been employed as part of the MCRI evaluation team. The bicultural researchers speak the language of the communities participating in GPC and have extensive community knowledge and networks to support consultation and other research activities. Specific training for the bicultural researchers has included: skills building in research activities (recruitment, informed consent, data collection, data security); processes for supporting participants experiencing distress; and opportunities to practice and receive feedback with research team members on facilitating discussion groups and conducting interviews.

### ***Community Advisory Groups***

Following principles of cultural safety,<sup>53</sup> Community Advisory Groups (CAGs) have been established for each refugee community. Our previous research with refugee background communities has established effective community engagement methodologies involving the employment of bicultural staff and the establishment of Community Advisory Groups.<sup>59</sup> Our methodology is inclusive, flexible and aims to build capacity and support ongoing community participation.

Recruitment of Community Advisors was undertaken by the bicultural researchers, with support from partner agencies. The aim of the CAGs is to involve women (and men where appropriate) from refugee backgrounds with a range of experiences (e.g. new parents, Elders, religious leaders). Community consultation was conducted by the bicultural community researchers to identify appropriate community advisors. The CAGs meet at key points relevant to the evaluation. The role of community advisors has been to: (i) provide community perspectives to ensure the evaluation methods are appropriate and meaningful; (ii) contribute to problem solving, interpretation and dissemination of the evaluation findings; (iii) facilitate wider community engagement; and (iv) provide a conduit between the MCRI research team and the community.

## ***Study design and evaluation framework***

This is a multi-site, multi-phase, quasi-experimental study using community-based participatory research methods and an interrupted time series design to evaluate a complex intervention (GPC). The time series design uses routinely collected hospital data to compare health service use and maternal and infant outcomes preceding and over the period of implementation of GPC.

To explore the program inputs and attributes, a prospective cohort of mothers participating in the GPC program across all sites is being recruited. Interviews are conducted at 30 weeks' gestation and at 4 months postpartum. To further enhance understanding of scale-up and implementation, we are conducting focus groups with participating women and service providers implementing the model of care. Finally, an assessment of cost effectiveness of the GPC program is being undertaken (Figure 2).

### ***Scaling-up complex interventions***

Scaling 'up' and scaling 'out' is a challenging process and involves changing systems, institutions, policies, practices and the culture of people, organisations and systems.<sup>55-57</sup> Not all elements are in the control of those wanting to implement the program. To determine what enables the capacity of systems to scale-up innovation (or not) requires a flexible and multi-faceted approach to evaluation. The Group Pregnancy Care study incorporates methods designed to answer questions that arise during implementation, enabling timely feedback to support scalability and sustainability.

Our approach to scaling up draws upon implementation science, complexity theory and social science – that is, scale-up as structured improvement.<sup>57</sup> To study the ecological properties of GPC as a complex intervention<sup>63</sup> addressing socially determined health inequalities, multiple methods and data sources, including both qualitative and quantitative data are being used. Rather than demonstrating success of the scale-up of GPC by measuring fidelity of its replication alone, we seek to generate a nuanced understanding of what changed during implementation, why and how. We will draw upon: 1) implementation science which takes a structured approach to developing, replicating and evaluating interventions in multiple sites; 2) complexity science which encourages a flexible and adaptive approach to change in dynamic systems; and 3) social science which aims to consider why people act in the way they do, encompassing the organisational and wider social forces that shape and constrain people's actions.<sup>57</sup> These approaches will be used in combination to understand the challenges of spread and scale-up of a complex intervention. Our model of GPC as a complex intervention has been co-designed with each community, as we know that culturally adapting interventions can increase salience, acceptability and uptake.<sup>58</sup> Currently, there is insufficient evidence on the clinical effectiveness or cost-effectiveness of such an approach. We hope to contribute to this evidence base with learnings that can be translated to other settings, and more broadly, to policy and practice guidance.<sup>59</sup>

[Insert Figure 2 about here]

## Methods and analysis

### Setting

We will evaluate seven GPC programs at four sites involving six different refugee background communities (See Figure 3). The sites include public maternity hospitals in Melbourne's west, north and south east suburbs, all areas of high cultural diversity and increasing refugee settlement.

[Insert Figure 3 about here]

### Program Effectiveness (Aim 1)

#### Data extraction from the Birthing Outcomes System

To facilitate the interrupted time-series analysis, all partner hospitals are extracting data from the electronic Birthing Outcomes System (BOS) for all women giving birth at each site for a 12-month period prior to commencement of GPC (baseline) and at 6 monthly intervals from implementation of GPC until completion. The BOS is a database collecting routine data including demographic information, service contact, screening results and maternal and neonatal outcomes (Table 2). We will categorise women according to whether they are Australian born or born overseas in an English-speaking country or non-English speaking country. In addition, we will identify all women from the cultural backgrounds of women participating in GPC, identified by county of birth and language spoken. Women enrolled in GPC will be identified in the BOS by a code in the data set.

**Table 2 Data to be extracted from hospital Birthing Outcomes System**

#### PRIMARY OUTCOME

Number of women attending  $\geq 7$  antenatal clinic visits

#### SECONDARY OUTCOMES

**Pregnancy care:** First antenatal visit  $<14$  weeks, ultrasound scan  $<14$  weeks, number of visits with a professional interpreter involved, screening/diagnostic tests for gestational diabetes at  $< 30$  weeks

**Maternal pregnancy medical conditions and complications:** hypertension, anaemia, pre-eclampsia, antepartum haemorrhage, gestational diabetes, threatened preterm labour, emergency department attendance

**Pregnancy and birth events:** induction of labour, method of birth, 3<sup>rd</sup> or 4<sup>th</sup> degree tear

**Maternal morbidity and mortality:** intrapartum or post-partum haemorrhage, wound infection, admission to intensive care, post-discharge readmission, maternal death

**Infant outcomes:** preterm birth ( $<37$  weeks), low birthweight ( $<2500$  grams), small/large for gestational age ( $<10^{\text{th}}/90^{\text{th}}$  centile), admission to neonatal/special care nursery for  $>12$  hours, unplanned home birth, birth on way to hospital, stillbirth, neonatal death

## Covariates

### Demographics

Maternal country of birth, year of arrival in Australia, interpreter required, language(s) spoken, place of residence, maternal age at time of birth (years), relationship status,

**Reproductive history:** parity; plurality; gravidity, pre-existing medical conditions

### *Medical record data abstraction*

Non-routinely collected items such as referral pathways will be collected from the hospital records of women participating in GPC. Information will be abstracted on screening, referral and follow-up of medical and psychosocial issues including: high blood pressure, gestational diabetes, suspected intra-uterine growth restriction, maternal mental health and family violence. Data collection will be undertaken by a research midwife following a protocol using a standardised form. De-identified data will be entered into the Research Electronic Data Capture (REDCap) online software.<sup>60</sup>

### *Comparative study populations, sample size and study power*

Based on the pilot program, we anticipated that 4 sites would implement 7 programs, providing an average of 74 women per group to participate in the evaluation. Allowing for an average loss of 4 women per group (5%), our projected comparison is based on 490 women participating over the period of provision of GPC. Comparisons will be made with i) 490 women receiving antenatal care in the 12 months preceding introduction of GPC; and ii) 490 women contemporaneously enrolled in other models of care. These comparative populations will include women from the same cultural/language background receiving antenatal care at the same hospitals, selecting the most closely matched woman in regards to age and parity for each woman participating in GPC.

As the level of intragroup correlation in attendance is unknown but expected to be low, we will include an intra-class correlation in attendance by hospital for women not participating in GPC, ICC 0.001, and an ICC of 0.005 within groups for women participating in GPC. A level of 5% is considered significant for all comparisons. Using the hospital data as the basis for estimates, the comparisons would each provide 94% power to detect a minimum absolute difference in attendance at 7 or more antenatal visits of 10% (from the current 76% to 86%). Seven visits are considered the minimum for a healthy pregnancy without complications.<sup>35</sup>

### *Statistical analysis*

i) All statistical analyses will be performed using STATA 15.<sup>61</sup> An interrupted time-series comparison<sup>62 63</sup> will be used to investigate the difference in the primary outcome - proportion of mothers attending the recommended number of antenatal visits - associated with the introduction of GPC. This comparison will be made using multilevel regression models accounting for clustering of mothers within hospitals/pregnancy groups, autocorrelation of the observed primary outcome over time and potential period effects (e.g. changes in the percentage of families of refugee background in the hospital service area). Models will thus



1  
2  
3 include whether the timing of pregnancy was pre or post introduction of the GPC; and an  
4 additional item reflecting trend in antenatal attendance over the course of the evaluation to  
5 account for any contemporaneous patterns of attendance. Maternal characteristics specified  
6 *a priori* will be controlled for including: age; reproductive history and pregnancy  
7 complications (e.g. parity, prior preterm birth, prior stillbirth); gestation at program  
8 enrolment; country of birth; year of arrival; and other sociodemographic characteristics – this  
9 accounting for changes in the eligible population over the study period.  
10  
11  
12

13 ii) Comparisons between women contemporaneously participating in GPC and other models  
14 of care will be conducted using congruent modelling strategies replacing the comparator of  
15 whether the timing of pregnancy was pre or post introduction of the GPC with the comparator  
16 of participating in GPC versus other models of care.  
17  
18  
19

## 20 ***Program Implementation (Aim 2)***

21  
22 An approach using iterative continuous quality improvement cycles will apply the Plan Do  
23 Study Act method (PDSA)<sup>64</sup> for collecting and analysing data and feeding it back to the Local  
24 Partnership Groups to refine GPC and continue to improve it.<sup>65</sup> This feedback aims to support  
25 and strengthen potential for intervention sustainability. Specifically, we will utilise the PDSA  
26 method to (i) conduct an initial assessment of the key elements of the model from the  
27 perspective of women/families and staff; (ii) identify barriers and enablers for  
28 implementation, and (iii) refine program elements and implement strategies to minimise  
29 barriers and maximise opportunities to achieve objectives. The researchers have used this  
30 method successfully in other maternity initiatives.<sup>66</sup> Three data sources will be used to gather  
31 data.  
32  
33  
34

35  
36 1. Data will be abstracted from hospital records of women participating in GPC to inform  
37 improvement (as described above in Program Effectiveness).  
38

39  
40 2. Focus groups with women will be used to explore experiences of: accessibility and program  
41 content and relevance. A semi-structured discussion guide will be developed in consultation  
42 with the bicultural researchers. A nested purposive sample of 5-8 women from each GPC  
43 program who have completed the 16-week postpartum interview will be recruited (4 groups,  
44 n=20-30). Invited women will have a variety of experiences related to: time in Australia,  
45 English language fluency and group attendance. Focus groups will be conducted in women's  
46 preferred language co-facilitated by the MCRI bicultural researchers and will be audio  
47 recorded (with informed consent), transcribed verbatim, translated to English and analysed  
48 using thematic analysis.<sup>67</sup>  
49  
50

51  
52 3. Midwives, MCH nurses, interpreters, bicultural workers and management involved in  
53 delivery of the new model (n=35-45 participants) will be invited to participate in focus  
54 groups/interviews. Discussions will explore process evaluation measures including staff  
55 experiences of program implementation, cross-sector collaboration, capacity building, skill  
56 development, multidisciplinary team work, organisational and systems change, and  
57 program/workforce sustainability.  
58  
59  
60

### ***Women's experiences (Aim 3)***

All women enrolled in GPC will be invited to complete an interview with a bicultural researcher at approximately 28-32 weeks' gestation and 3-4 months postpartum. The interviews will ask about their health, health literacy, their social connections and their experiences of GPC. The MCRI bicultural researchers will recruit women and conduct the interviews.

#### ***Design and translation of structured interview***

Standardised measures were used where possible, subject to pre-testing to ensure cultural acceptability. To optimise data quality, all study materials were translated into required languages by a professional agency and with the assistance of the bicultural researchers, translated back into English to ensure high quality and accurate translations.<sup>68</sup> Maternal interviews were audio recorded (with participant consent) and transcribed into English by bicultural staff.

Parent mental health was measured using the Hopkins Symptom Checklist and Harvard Trauma Questionnaire, developed for refugee populations.<sup>69</sup> Working with the MCRI bicultural researchers and the CAGs, we pilot tested the Edinburgh Postnatal Depression Scale,<sup>70 71</sup> and the Composite Abuse Scale (measures experiences of physical and psychological abuse within intimate partner relationships) to determine acceptability, or not, by all communities participating in GPC.<sup>72</sup> Other domains include: general demographics, health literacy, social connections and experiences of care.

#### ***Recruitment of nested prospective pregnancy cohort***

The bicultural researchers attended the GPC site corresponding to their community, where they explain their role in the evaluation. Eligible women are enrolled in GPC and  $\geq 18$  years. Women were not eligible to take part if they were too unwell to participate, had an intellectual disability or medical condition precluding them from giving informed consent (e.g. psychotic illness).

Participant details are all stored on a REDCap database which produced a report based on women's estimated due date to notify the research team when a woman is due to be contacted to schedule the postnatal interview.

#### ***Data Analysis***

After the completion of each interview, the bicultural researchers transcribed the audio-recording to provide a comprehensive interview transcript in English. All data collected in the interview is manually entered by research team staff into REDCap. Quantitative data will be exported to Stata 15 for scoring and analysis. Qualitative data will be exported to and managed in NVivo<sup>73</sup> for thematic analysis. Four steps for thematic data analysis will be followed: immersion, coding, categorising and developing themes.<sup>67</sup>

### ***Cost effectiveness (Aim 4)***

Data on resources used to deliver the intervention will be collected including time commitments of paid staff and participating women. These will be valued (\$AUD) at standard

1  
2  
3 unit costs (e.g. salary scales, interpreter costs, travel) to calculate intervention costs specific  
4 to each site. Intervention costs will be combined with potential cost-offsets and outcomes  
5 data (Table 2) in an economic evaluation that compares additional costs associated with GPC  
6 to changes in health outcomes (cost-consequences analysis).<sup>74</sup> Potential cost-offsets from  
7 improved maternal and child health outcomes will be estimated by partner hospitals based  
8 on routine perinatal data and hospital financial systems data on in-hospital care costs. As part  
9 of the qualitative data collection with GPC staff and stakeholders, information will be  
10 collected to inform the economic evaluation.  
11  
12  
13

## 14 *Progress to date*

### 15 *Implementation of Group Pregnancy Care*

16  
17  
18 Planning for expansion of GPC to three new sites commenced in 2017. However, due to  
19 staffing and resource constraints at two of these sites, only the initial pilot program and one  
20 new program remain part of the evaluation (involving the Karen and Assyrian Chaldean  
21 communities). Additional funding was secured in late 2019 to conduct consultation with two  
22 additional communities (Sudanese/South Sudanese and Iraqi/Syrian Muslim) with a view to  
23 establishing two new GPC programs and joining the overall evaluation.  
24  
25

### 26 *Implications of COVID-19 pandemic*

27  
28 In response to the global COVID-19 pandemic, Australia initiated strict internal lockdown  
29 policies to reduce the risk of community transmission in late March 2020. As a result, the two  
30 established GPC programs paused provision of group sessions, and planning for the two new  
31 GPC programs was put on hold. The two established programs transitioned to virtual  
32 platforms for clinical and group-based information sessions between March–November 2020.  
33 Group sessions using an online platform were initiated in response to the ongoing need for  
34 women and families to connect to services and peers for information and support.  
35  
36

37 The evaluation has also continued, adapting to telephone/video interviews with women and  
38 staff/stakeholders. The abrupt disruption to GPC services flowing from the COVID-19  
39 pandemic mean the numbers of women participating in GPC and available for the interviews  
40 will be lower than planned.  
41

42 Given these circumstances, the intended sample size will not be achieved within the intended  
43 study completion period. At this point, interim analyses will be conducted and preliminary  
44 findings will be shared with the study partners and funders. Interim analyses will provide  
45 substantial outputs in regard to process and implementation learnings (Aim 2) and participant  
46 experiences (Aim 3) as well as preliminary exploration of responses in the primary outcome  
47 (proportion of women attending  $\geq 7$  antenatal clinic visits – Aim 1). Extension of the study with  
48 the two additional communities at the new sites for which funding has been secured plus  
49 continuation of the program at the existing sites where feasible, will provide the opportunity  
50 to extend evaluation to achieve the intended sample size for the full comparisons (Aim 1) and  
51 economic evaluation (Aim 4).  
52  
53  
54  
55  
56  
57  
58  
59  
60

## ***Ethics and dissemination***

### ***Ethical considerations***

Human Research Ethics Committee approvals have been provided by all six relevant authorities through the Australian National Mutual Acceptance scheme, where permitted. Ethical amendments were sought for each stage of the study following community and partner organisation consultation to finalise each stage. This staged approach enables piloting and reflection on the cultural safety<sup>53</sup> of the research activities and flexibility to refine research processes to ensure appropriateness and meaningfulness to community members, bicultural researchers and partners. At the time of submitting this protocol, HREC approval had been granted for all stages of the study with a modification for data abstraction pending at one partner site.

In Australia, there are specific ethical guidelines for conducting research with Aboriginal and Torres Strait Islander Communities.<sup>75</sup> However, an equivalent national approach to mandatory ethical research guidelines for the engagement of refugee background communities does not exist. We are mindful of the ethical issues to consider when conducting research with people of refugee background.<sup>76 77</sup> As the concepts of research and ethics may be unfamiliar to some participants, we acknowledge the possibility that participants may feel anxious about their involvement. Concerns may be provoked when issues such as privacy, trust and confidentiality, audio recording of interviews etc. are not clear or comfortable for the participant. The bicultural researchers will clarify the voluntary nature of research participation and encourage participants to ask questions to alleviate any concerns, as per our previous research.<sup>78</sup> A study distress protocol developed in partnership with Foundation House and used in our previous research studies will guide the researchers in situations where participants become distressed, require support or disclose issues related to mental health, family violence or participant/child safety.

HREC approvals: The Royal Children's Hospital 37025, HREC/17/RCHM/66, MCRI SSA/17/RCHM/97, Monash Health 17-424X, HREC/16/MONH/65, SSA/17/MonH/362, Northern Health HREC/17/RCHM/66, SSA/17/NH/104, Western Health HREC/17/RCHM/66, SSA/AU/5/C@E0314, Mercy Health 2017-017, Victorian Department of Health and Human Services HHSD/19/174035.

### ***Dissemination***

We have developed a comprehensive knowledge translation and dissemination plan in line with our values of reciprocity and collaboration. Including: sharing study findings with communities in accessible ways (via bicultural researchers at Community Advisory Groups), presentations at community forums, partnership meetings, conferences, policy and practice briefs and publication of journal articles. All outputs will be available on the study website.

### ***Conclusion***

Group Pregnancy Care for women and their families from refugee backgrounds is an innovative, complex intervention that aims to provide an equitable approach to pregnancy and early postnatal care addressing the health and social inequalities experienced by refugee families. This multi-component evaluation will provide insights into what it takes to

1  
2  
3 implement innovative, collaborative, culturally-safe, co-designed and sustainable models of  
4 care within the constraints of existing resources.  
5

### 6 ***Authors' contributors***

7  
8 ER is the study Principal Investigator and drafted this protocol based on the project proposal  
9 and other planning documents involving many people as outlined in the author contribution  
10 and acknowledgements. JY, FM, LG, JS, IK, RS, PM, CE, CH, JB, JO, LH, DC and SB are study  
11 investigators who contributed to the development of the project proposal and project  
12 planning. FM conducted sample size estimate calculations for the interrupted time series  
13 design. AK, EM, LB are employed on the project and have contributed to development of  
14 planning documents, conceptual framework, ethics submissions which involve many of the  
15 components outlined in this protocol, and drafting the manuscript. All authors contributed  
16 to drafting and finalising the manuscript.  
17  
18  
19

### 20 ***Funding***

21  
22 This work is supported by the Victorian Government Department of Premier and Cabinet's  
23 Strategic Partnerships Metro - Capacity Building and Participation Program, the North West  
24 Melbourne Primary Health Network and the Murdoch Children's Research Institute  
25 Population Health Theme. Research at the MCRI is supported by the Victorian Government's  
26 Operational Infrastructure Support Program. Jane Yelland was supported by a National Health  
27 and Medical Research Council (NHMRC) of Australia Translating Research into Practice  
28 Fellowship (1150566). Stephanie Brown was supported by a NHMRC Senior Research  
29 Fellowship (1103976). Fiona Mensah was supported by a NHMRC Career Development  
30 Fellowship (1111160).  
31  
32  
33

### 34 ***Competing interests***

35  
36 None declared.  
37

### 38 ***Data availability statement***

39  
40 Data sharing not applicable as no data sets generated and/or analysed for this study  
41

### 42 ***Participant consent for publication***

43  
44 Not required.  
45

### 46 ***Acknowledgements***

47  
48 We acknowledge and thank the many health and social care professionals, managers,  
49 administrators, and policy personnel engaged in Group Pregnancy Care in a myriad of ways.  
50 In particular, we would like to thank Professor Jeremy Oats, Professor Louise Howard, Ms  
51 Donna Chesters, Ms Heidi Zwick, Ms Colleen Turner, Ms Janet Elefsiniotis, Ms Sayanti Bhatta,  
52 Ms Karen Diacono, Ms Pauline Petschel, Ms Ann McNair, Ms Catherine Fletcher, Ms Adele  
53 Mollo, Ms Elizabeth Murdoch and other key staff from Mercy Health (Werribee Mercy  
54 Hospital), Northern Health, Monash Health, Western Health, Wyndham City Council, Hume  
55 City Council, Brimbank City Council, Foundation House, VICSEG New Futures, the Groupwork  
56 Centre, and personnel at the Victorian Government Department of Health and Human  
57 Services and the Municipal Association of Victoria.  
58  
59  
60

1  
2  
3  
4  
5  
6  
7  
8  
9  
10  
11  
12  
13  
14  
15  
16  
17  
18  
19  
20  
21  
22  
23  
24  
25  
26  
27  
28  
29  
30  
31  
32  
33  
34  
35  
36  
37  
38  
39  
40  
41  
42  
43  
44  
45  
46  
47  
48  
49  
50  
51  
52  
53  
54  
55  
56  
57  
58  
59  
60

## References

1. Drysdale H, Ranasinha S, Kendall A, et al. Ethnicity and the risk of late-pregnancy stillbirth. *Med J Aust* 2012;197(5):278-81. doi: 10.5694/mja12.10125
2. Gibson-Helm ME, Teede HJ, Cheng IH, et al. Maternal Health and Pregnancy Outcomes Comparing Migrant Women Born in Humanitarian and Nonhumanitarian Source Countries: A Retrospective, Observational Study. *Birth* 2015;42(2):116-24.
3. Porter M, Haslam N. Predisplacement and postdisplacement factors associated with mental health of refugees and internally displaced persons: A meta-analysis. *J Am Med Assoc* 2005;294(5):602-12.
4. Chen W, Hall BJ, Ling L, et al. Pre-migration and post-migration factors associated with mental health in humanitarian migrants in Australia and the moderation effect of post-migration stressors: findings from the first wave data of the BNLA cohort study. *The Lancet Psychiatry* 2017;4(3):218-29. doi: 10.1016/s2215-0366(17)30032-9
5. Beiser M. Resettling refugees and safeguarding their mental health: lessons learned from the Canadian Refugee Resettlement Project. *Transcult Psychiatry* 2009;46(4):539.
6. Fazel M, Reed RV, Panter-Brick C, et al. Review: Mental health of displaced and refugee children resettled in high-income countries: risk and protective factors. *The Lancet* 2012;379:266-82. doi: 10.1016/S0140-6736(11)60051-2
7. Wilmsen B. Family separation and the impacts on refugee settlement in Australia. *The Australian Journal of Social Issues* 2013;48(2):241.
8. Steel Z, Chey T, Silove D, et al. Association of torture and other potentially traumatic events with mental health outcomes among populations exposed to mass conflict and displacement: a systematic review and meta-analysis. *JAMA* 2009;302 doi: 10.1001/jama.2009.1132
9. Sangalang CC, Vang C. Intergenerational Trauma in Refugee Families: A Systematic Review. *J Immigr Minor Health* 2017;19(3):745-54. doi: 10.1007/s10903-016-0499-7 [published Online First: 2016/09/24]
10. Heslehurst N, Brown H, Pemu A, et al. Perinatal health outcomes and care among asylum seekers and refugees: a systematic review of systematic reviews. *BMC Med* 2018;16(1):89. doi: 10.1186/s12916-018-1064-0 [published Online First: 2018/06/13]
11. Kokou-Kpolou CK, Moukouta CS, Masson J, et al. Correlates of grief-related disorders and mental health outcomes among adult refugees exposed to trauma and bereavement: A systematic review and future research directions. *Journal of affective disorders* 2020;267:171-84. doi: 10.1016/j.jad.2020.02.026 [published Online First: 2020/03/29]
12. Heard-Garris NJ, Cale M, Camaj L, et al. Transmitting Trauma: A systematic review of vicarious racism and child health. *Social science & medicine (1982)* 2018;199:230-40. doi: 10.1016/j.socscimed.2017.04.018 [published Online First: 2017/05/01]
13. Garfin DR, Thompson RR, Holman EA. Acute stress and subsequent health outcomes: A systematic review. *Journal of psychosomatic research* 2018;112:107-13. doi: 10.1016/j.jpsychores.2018.05.017 [published Online First: 2018/08/12]
14. von Werthern M, Robjant K, Chui Z, et al. The impact of immigration detention on mental health: a systematic review. *BMC psychiatry* 2018;18(1):382. doi: 10.1186/s12888-018-1945-y [published Online First: 2018/12/14]
15. Kuh D, Ben-Shlomo Y. A life course approach to chronic disease epidemiology. 2nd ed. Oxford: Oxford University Press 2004.

16. World Health Organization. WHO recommendations on antenatal care for a positive pregnancy experience. Switzerland, 2016.
17. Riggs E, Muyeen S, Brown S, et al. Cultural safety and belonging for refugee background women attending group pregnancy care: An Australian qualitative study. *Birth* 2017;44(4):145-52. doi: 10.1111/birt.12272
18. UNHCR. Global Trends in Forced Displacement in 2018. Geneva, Switzerland: United Nations High Commissioner for Refugees, 2019.
19. Consultative Council on Obstetric and Paediatric Mortality and Morbidity. Victoria's Mothers, Babies and Children 2018. Melbourne, Victoria: Victorian Government, 2019.
20. Yelland J, Mensah F, Riggs E, et al. Evaluation of systems reform in public hospitals, Victoria, Australia, to improve access to antenatal care for women of refugee background: An interrupted time series design. *PLoS medicine* 2020;17(7):e1003089. doi: 10.1371/journal.pmed.1003089 [published Online First: 2020/07/11]
21. Kuzawa CW. Pregnancy as an intergenerational conduit of adversity: how nutritional and psychosocial stressors reflect different historical timescales of maternal experience. *Current Opinion in Behavioral Sciences* 2020;36:42-47. doi: <https://doi.org/10.1016/j.cobeha.2020.07.001>
22. McDonald S, Kehler H, Bayrampour H, et al. Risk and protective factors in early child development: Results from the All Our Babies (AOB) pregnancy cohort. *Research in developmental disabilities* 2016;58:20-30. doi: 10.1016/j.ridd.2016.08.010 [published Online First: 2016/09/03]
23. Olander EK, Smith DM, Darwin Z. Health behaviour and pregnancy: a time for change. *Journal of reproductive and infant psychology* 2018;36(1):1-3. doi: 10.1080/02646838.2018.1408965 [published Online First: 2018/03/09]
24. Vehmeijer FOL, Guxens M, Duijts L, et al. Maternal psychological distress during pregnancy and childhood health outcomes: a narrative review. *Journal of developmental origins of health and disease* 2019;10(3):274-85. doi: 10.1017/s2040174418000557 [published Online First: 2018/11/01]
25. Giallo R, Gartland D, Seymour M, et al. Maternal childhood abuse and children's emotional-behavioral difficulties: Intergenerational transmission via birth outcomes and psychosocial health. *Journal of family psychology : JFP : journal of the Division of Family Psychology of the American Psychological Association (Division 43)* 2020;34(1):112-21. doi: 10.1037/fam0000623 [published Online First: 2019/12/20]
26. Chamberlain C, O'Mara-Eves A, Porter J, et al. Psychosocial interventions for supporting women to stop smoking in pregnancy. *The Cochrane database of systematic reviews* 2017;2(2):Cd001055. doi: 10.1002/14651858.CD001055.pub5 [published Online First: 2017/02/15]
27. Kiely M, El-Mohandes AA, Gantz MG, et al. Understanding the association of biomedical, psychosocial and behavioral risks with adverse pregnancy outcomes among African-Americans in Washington, DC. *Maternal and child health journal* 2011;15 Suppl 1(Suppl 1):S85-95. doi: 10.1007/s10995-011-0856-z [published Online First: 2011/07/26]
28. Van Parys A-S, Verhamme A, Temmerman M, et al. Intimate partner violence and pregnancy: a systematic review of interventions. *PLoS One* 2014;9(1):e85084-e84. doi: 10.1371/journal.pone.0085084
29. Yelland J, Riggs E, Wahidi S, et al. How do Australian maternity and early childhood health services identify and respond to the settlement experience and social context



- of refugee background families? *BMC Pregnancy Childbirth* 2014;14(1):348. doi: 10.1186/1471-2393-14-348 [published Online First: 2014/10/07]
30. Riggs E, Davis E, Gibbs L, et al. Accessing maternal and child health services in Melbourne, Australia: reflections from refugee families and service providers. *BMC health services research* 2012;12:117. doi: 10.1186/1472-6963-12-117
31. Flenady V, Wojcieszek AM, Middleton P, et al. Stillbirths: recall to action in high-income countries. *Lancet (London, England)* 2016;387(10019):691-702. doi: 10.1016/s0140-6736(15)01020-x [published Online First: 2016/01/23]
32. Mobley S, Thomas S, Sutherland D, et al. Maternal Health Literacy Progression Among Rural Perinatal Women. *Maternal & Child Health Journal* 2014;18(8):1881-92. doi: 10.1007/s10995-014-1432-0
33. Carroll LN, Smith SA, Thomson NR. Parents as Teachers Health Literacy Demonstration Project: Integrating an Empowerment Model of Health Literacy Promotion Into Home-Based Parent Education. *Health Promotion Practice* 2015;16(2):282-90 9p. doi: 10.1177/1524839914538968
34. Small R, Taft AJ, Brown SJ. The power of social connection and support in improving health: lessons from social support interventions with childbearing women. *BMC Public Health* 2011;11 Suppl 5:S4. doi: 10.1186/1471-2458-11-S5-S4 [published Online First: 2011/12/30]
35. Department of Health. Clinical Practice Guidelines: Pregnancy Care. Canberra, Australia: Australian Government Department of Health, 2018.
36. Cunningham SD, Lewis JB, Shebl FM, et al. Group prenatal care reduces risk of preterm birth and low birth weight: A matched cohort study. 2019;28(1):17-22.
37. Picklesimer A, Heberlein E, Covington-Kolb S. Group Prenatal Care: Has Its Time Come? *Clinical Obstetrics & Gynecology* 2015;58(2):380-91 12p. doi: 10.1097/GRF.0000000000000095
38. Hetherington E, Tough S, McNeil D, et al. Vulnerable Women's Perceptions of Individual Versus Group Prenatal Care: Results of a Cross-Sectional Survey. *Maternal and child health journal* 2018;22(11):1632-38. doi: 10.1007/s10995-018-2559-1 [published Online First: 2018/06/24]
39. Liu R, Chao MT, Jostad-Laswell A, et al. Does CenteringPregnancy Group Prenatal Care Affect the Birth Experience of Underserved Women? A Mixed Methods Analysis. *J Immigr Minor Health* 2017;19(2):415-22. doi: 10.1007/s10903-016-0371-9 [published Online First: 2016/03/05]
40. Chae SY, Chae MH, Kandula S, et al. Promoting improved social support and quality of life with the CenteringPregnancy(®) group model of prenatal care. *Archives of women's mental health* 2017;20(1):209-20. doi: 10.1007/s00737-016-0698-1 [published Online First: 2016/12/19]
41. Cox R, Obichere R, Knoll F, et al. A study to compare productivity and cost of the CenteringPregnancy model of prenatal care with a traditional prenatal care model. Final Report to March of Dimes., 2006.
42. Catling CJ, Medley N, Foureur M, et al. Group versus conventional antenatal care for women. *The Cochrane database of systematic reviews* 2015;2:CD007622. doi: 10.1002/14651858.CD007622.pub3
43. Byerley BM, Haas DM. A systematic overview of the literature regarding group prenatal care for high-risk pregnant women. *BMC Pregnancy Childbirth* 2017;17(1):329. doi: 10.1186/s12884-017-1522-2 [published Online First: 2017/10/01]

- 1
- 2
- 3
- 4 44. Carter EB, Barbier K, Sarabia R, et al. Group versus traditional prenatal care in low-risk
- 5 women delivering at term: a retrospective cohort study. *Journal of perinatology : official journal of the California Perinatal Association* 2017;37(7):769-71. doi:
- 6 10.1038/jp.2017.33 [published Online First: 2017/03/31]
- 7
- 8 45. Abshire C, McDowell M, Crockett AH, et al. The Impact of CenteringPregnancy Group
- 9 Prenatal Care on Birth Outcomes in Medicaid Eligible Women. *J Womens Health (Larchmt)* 2019;28(7):919-28. doi: 10.1089/jwh.2018.7469 [published Online First:
- 10 2019/07/02]
- 11
- 12
- 13 46. Cunningham SD, Lewis JB, Shebl FM, et al. Group Prenatal Care Reduces Risk of Preterm
- 14 Birth and Low Birth Weight: A Matched Cohort Study. *J Womens Health (Larchmt)*
- 15 2018 doi: 10.1089/jwh.2017.6817 [published Online First: 2018/09/27]
- 16
- 17 47. Australian Government Department of Health. Medicare Canberra, Australia2020
- 18 [Available from: [www.health.gov.au/health-topics/medicare](http://www.health.gov.au/health-topics/medicare).
- 19
- 20 48. Hospital TRCs. Asylum Seekers Melbourne, Australia2020 [Available from:
- 21 [https://www.rch.org.au/immigranthealth/clinical/Asylum\\_seekers/](https://www.rch.org.au/immigranthealth/clinical/Asylum_seekers/).
- 22
- 23 49. Victorian Foundation for the Survivors of Torture. Rebuilding Shattered Lives.
- 24 Melbourne, 1998.
- 25
- 26 50. Mitchell P, Pirkis J, Hall J, et al. Partnerships for knowledge exchange in health services
- 27 research, policy and practice. *Journal of health services research & policy*
- 28 2009;14(2):104-11. doi: 10.1258/jhsrp.2008.008091
- 29
- 30 51. Victorian Foundation for the Survivors of Torture. Professional Development: Training
- 31 Melbourne2020 [Available from:
- 32 [http://www.foundationhouse.org.au/professional\\_development/index.htm](http://www.foundationhouse.org.au/professional_development/index.htm).
- 33
- 34 52. Centre G. Workplace Training 2020 [Available from: <https://groupwork.com.au>.
- 35
- 36 53. Curtis E, Jones R, Tipene-Leach D, et al. Why cultural safety rather than cultural
- 37 competency is required to achieve health equity: a literature review and
- 38 recommended definition. *International journal for equity in health* 2019;18(1):174.
- 39 doi: 10.1186/s12939-019-1082-3 [published Online First: 2019/11/16]
- 40
- 41 54. Ellis BH, Kia-Keating M, Yusuf SA, et al. Ethical Research in Refugee Communities and the
- 42 Use of Community Participatory Methods. *Transcult Psychiatry* 2007;44(3):459-81.
- 43 doi: 10.1177/1363461507081642
- 44
- 45 55. Horton T, Illingworth J, W W. The Spread Challenge: how to support the successful
- 46 uptake of innovations and improvements in health care. London, 2018.
- 47
- 48 56. Greenhalgh T, Wherton J, Papoutsi C, et al. Beyond Adoption: A New Framework for
- 49 Theorizing and Evaluating Nonadoption, Abandonment, and Challenges to the Scale-
- 50 Up, Spread, and Sustainability of Health and Care Technologies. *J Med Internet Res*
- 51 2017;(19(11):e367)
- 52
- 53 57. Greenhalgh T, Papoutsi C. Spreading and scaling up innovation and improvement. *BMJ*
- 54 2019;365:l2068. doi: 10.1136/bmj.l2068 [published Online First: 2019/05/12]
- 55
- 56 58. Liu J, Davidson E, Bhopal R, et al. Adapting health promotion interventions to meet the
- 57 needs of ethnic minority groups: mixed-methods evidence synthesis. *Health Technol*
- 58 *Assess* 2012;16(44):1-469. doi: 10.3310/hta16440
- 59
- 60 59. Tannahill C, Sridharan S. Getting real about policy and practice needs: evaluation as a
- bridge between the problem and solution space. *Evaluation and program planning*
- 2013;36(1):157-64. doi: 10.1016/j.evalprogplan.2012.03.002 [published Online First:
- 2012/04/07]

- 1
  - 2
  - 3
  - 4
  - 5
  - 6
  - 7
  - 8
  - 9
  - 10
  - 11
  - 12
  - 13
  - 14
  - 15
  - 16
  - 17
  - 18
  - 19
  - 20
  - 21
  - 22
  - 23
  - 24
  - 25
  - 26
  - 27
  - 28
  - 29
  - 30
  - 31
  - 32
  - 33
  - 34
  - 35
  - 36
  - 37
  - 38
  - 39
  - 40
  - 41
  - 42
  - 43
  - 44
  - 45
  - 46
  - 47
  - 48
  - 49
  - 50
  - 51
  - 52
  - 53
  - 54
  - 55
  - 56
  - 57
  - 58
  - 59
  - 60
60. Harris PA, Taylor R, Minor BL, et al. The REDCap consortium: Building an international community of software platform partners. *Journal of biomedical informatics* 2019;95:103208. doi: 10.1016/j.jbi.2019.103208 [published Online First: 2019/05/13]
61. StataCorp. Stata Statistical Software: Release 16. College Station, Texas: StatCorp LP, 2020.
62. Penfold RB, Zhang F. Use of interrupted time series analysis in evaluating health care quality improvements. *Academic pediatrics* 2013;13(6 Suppl):S38-44. doi: 10.1016/j.acap.2013.08.002 [published Online First: 2013/12/07]
63. Lopez Bernal J, Cummins S, Gasparrini A. The use of controls in interrupted time series studies of public health interventions. *International journal of epidemiology* 2018;47(6):2082-93. doi: 10.1093/ije/dyy135 [published Online First: 2018/07/10]
64. Langley G, Moen R, Nolan K, et al. The improvement guide: a practical approach to enhancing organizational performance. San Francisco CA: Jossey-Bass 2009.
65. Bisognano M, Cherouny PH, Gullo S. Applying a science-based method to improve perinatal care: the institute for healthcare improvement perinatal improvement community. *Obstetrics and gynecology* 2014;124(4):810-4. doi: 10.1097/AOG.0000000000000474
66. Yelland J, Biro MA, Dawson W, et al. Bridging the language gap: a co-designed quality improvement project to engage professional interpreters for women during labour. *Aust Health Rev* 2016 doi: 10.1071/AH16066
67. Green J, Willis K, Hughes E, et al. Generating best evidence from qualitative research: the role of data analysis. *Aust N Z J Public Health* 2007;31(6):545-50. doi: 10.1111/j.1753-6405.2007.00141.x [published Online First: 2007/12/18]
68. Small R, Yelland J, Lumley J, et al. Cross-cultural research: trying to do it better 2. Enhancing data quality. *Aust N Z J Public Health* 1999;23(4):390-95. doi: 10.1111/j.1467-842X.1999.tb01280.x
69. Mollica RF, Caspi-Yavin Y, Bollini P, et al. The Harvard Trauma Questionnaire: validating a cross-cultural instrument for measuring torture, trauma, and posttraumatic stress disorder in Indochinese refugees. 1992
70. Cox JL, Holden JM, Sagovsky R. Detection of postnatal depression: development of the 10-item Edinburgh Postnatal Depression Scale. *British Journal of Psychiatry* 1987;150:782-86.
71. Small R, Lumley J, Yelland J, et al. The performance of the Edinburgh Postnatal Depression Scale in English speaking and non-English speaking populations in Australia. *Soc Psychiatry Psychiatr Epidemiol* 2007;42(1):70-8. doi: 10.1007/s00127-006-0134-3 [published Online First: 2006/11/15]
72. Hegarty K, Fracgp, Bush R, et al. The composite abuse scale: further development and assessment of reliability and validity of a multidimensional partner abuse measure in clinical settings. *Violence and victims* 2005;20(5):529-47. [published Online First: 2005/10/27]
73. QSR International. NVivo 12 Plus. Version 12: QSR International Pty Ltd, 2018.
74. Drummond M, Sculpher M, Torrance G, et al. Methods for the economic evaluation of health care programmes. 3rd ed. UK: Oxford University Press 2005.
75. National Health and Medical Research Council. Ethical conduct in research with Aboriginal and Torres Strait Islander Peoples and communities: Guidelines for researchers and stakeholders. Canberra: Commonwealth of Australia, 2018.

- 1  
2  
3 76. Block K, Riggs E, Haslam NJV, et al. Values and vulnerabilities: The ethics of research with  
4 refugees and asylum seekers. 2013:xvii.  
5  
6 77. Mackenzie C, McDowell C, Pittaway EJJors. Beyond 'do no harm': The challenge of  
7 constructing ethical relationships in refugee research. 2007;20(2):299-319.  
8  
9 78. Riggs E, Yelland J, Szwarc J, et al. Promoting the inclusion of Afghan women and men in  
10 research: reflections from research and community partners involved in implementing  
11 a 'proof of concept' project. *International journal for equity in health* 2015;14(1):13.  
12 doi: 10.1186/s12939-015-0145-3  
13  
14  
15  
16  
17  
18  
19  
20  
21  
22  
23  
24  
25  
26  
27  
28  
29  
30  
31  
32  
33  
34  
35  
36  
37  
38  
39  
40  
41  
42  
43  
44  
45  
46  
47  
48  
49  
50  
51  
52  
53  
54  
55  
56  
57  
58  
59  
60

1  
2  
3 **Figure legends**  
4

5 **Figure 1 Conceptual model of Group Pregnancy Care to improve outcomes**  
6

7 **Figure 2 Evaluation overview**  
8

9 **Figure 3 Planned Group Pregnancy Care Sites and Programs**  
10  
11  
12  
13  
14  
15  
16  
17  
18  
19  
20  
21  
22  
23  
24  
25  
26  
27  
28  
29  
30  
31  
32  
33  
34  
35  
36  
37  
38  
39  
40  
41  
42  
43  
44  
45  
46  
47  
48  
49  
50  
51  
52  
53  
54  
55  
56  
57  
58  
59  
60

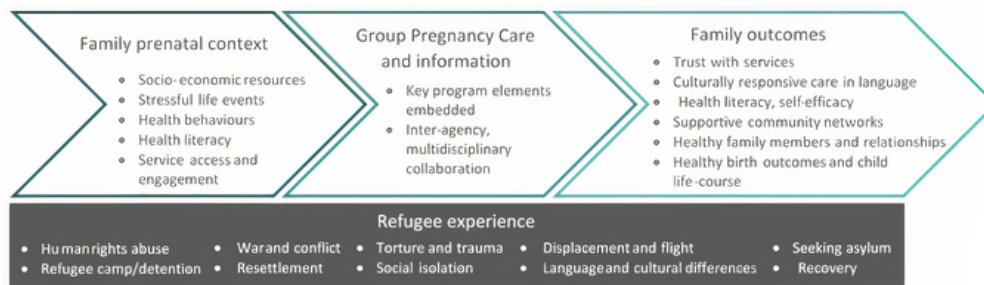

Figure 1 Conceptual model of Group Pregnancy Care to improve outcomes

|                                        |                                                                                                                                                              |
|----------------------------------------|--------------------------------------------------------------------------------------------------------------------------------------------------------------|
| Program Effectiveness<br><i>Aim 1</i>  | Method: Interrupted time-series using routinely collected hospital data supplemented by data on referral pathways obtained from hospital medical records     |
| Program Implementation<br><i>Aim 2</i> | Method: Plan Do Study Act cycles, using 1) data from medical records 2) structured interviews with women 3) focus groups with women, staff, and stakeholders |
| Women's Experiences<br><i>Aim 3</i>    | Method: Community consultation and structured interviews with women in a nested cohort                                                                       |
| Cost Effectiveness<br><i>Aim 4</i>     | Method: Economic costings using data collected via staff/stakeholder interviews/focus groups                                                                 |

Figure 2. Evaluation overview

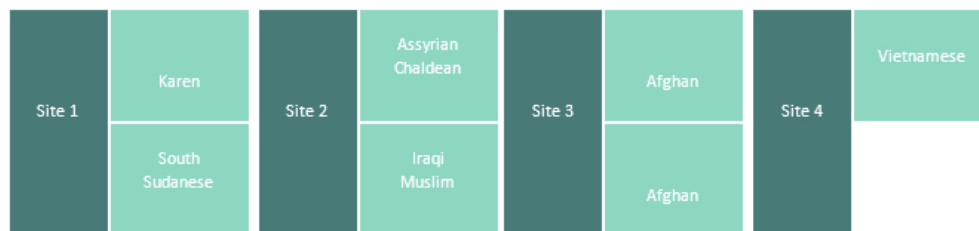

Figure 3. Planned Group Pregnancy Care Sites and Programs



# Reporting checklist for quality improvement in health care.

Based on the SQUIRE guidelines.

## Instructions to authors

Complete this checklist by entering the page numbers from your manuscript where readers will find each of the items listed below.

Your article may not currently address all the items on the checklist. Please modify your text to include the missing information. If you are certain that an item does not apply, please write "n/a" and provide a short explanation.

Upload your completed checklist as an extra file when you submit to a journal.

In your methods section, say that you used the SQUIRE reporting guidelines, and cite them as:

Ogrinc G, Davies L, Goodman D, Batalden P, Davidoff F, Stevens D. SQUIRE 2.0 (Standards for QQuality Improvement Reporting Excellence): revised publication guidelines from a detailed consensus process

|              | Reporting Item                                                                                                                                                                                                                                      | Page Number |
|--------------|-----------------------------------------------------------------------------------------------------------------------------------------------------------------------------------------------------------------------------------------------------|-------------|
| Title        | <a href="#">#1</a> Indicate that the manuscript concerns an initiative to improve healthcare (broadly defined to include the quality, safety, effectiveness, patientcenteredness, timeliness, cost, efficiency, and equity of healthcare)           | 1           |
|              |                                                                                                                                                                                                                                                     |             |
| Abstract     | <a href="#">#02a</a> Provide adequate information to aid in searching and indexing                                                                                                                                                                  | 3           |
|              | <a href="#">#02b</a> Summarize all key information from various sections of the text using the abstract format of the intended publication or a structured summary such as: background, local problem, methods, interventions, results, conclusions | 3           |
|              |                                                                                                                                                                                                                                                     |             |
| Introduction |                                                                                                                                                                                                                                                     |             |
|              | Problem description <a href="#">#3</a> Nature and significance of the local problem                                                                                                                                                                 | 4           |

|    |                 |                      |                                                                                                           |       |
|----|-----------------|----------------------|-----------------------------------------------------------------------------------------------------------|-------|
| 1  | Available       | <a href="#">#4</a>   | Summary of what is currently known about the problem, including relevant previous studies                 | 4-6   |
| 2  |                 |                      |                                                                                                           |       |
| 3  | knowledge       |                      |                                                                                                           |       |
| 4  |                 |                      |                                                                                                           |       |
| 5  | Rationale       | <a href="#">#5</a>   | Informal or formal frameworks, models, concepts, and / or theories used to explain the problem, any       | 5-9   |
| 6  |                 |                      | reasons or assumptions that were used to develop the intervention(s), and reasons why the intervention(s) |       |
| 7  |                 |                      | was expected to work                                                                                      |       |
| 8  |                 |                      |                                                                                                           |       |
| 9  |                 |                      |                                                                                                           |       |
| 10 |                 |                      |                                                                                                           |       |
| 11 | Specific aims   | <a href="#">#6</a>   | Purpose of the project and of this report                                                                 | 8-9   |
| 12 |                 |                      |                                                                                                           |       |
| 13 |                 |                      |                                                                                                           |       |
| 14 | <b>Methods</b>  |                      |                                                                                                           |       |
| 15 |                 |                      |                                                                                                           |       |
| 16 |                 |                      |                                                                                                           |       |
| 17 | Context         | <a href="#">#7</a>   | Contextual elements considered important at the outset of introducing the intervention(s)                 | 11    |
| 18 |                 |                      |                                                                                                           |       |
| 19 | Intervention(s) | <a href="#">#08a</a> | Description of the intervention(s) in sufficient detail that others could reproduce it                    | 11-15 |
| 20 |                 |                      |                                                                                                           |       |
| 21 | Intervention(s) | <a href="#">#08b</a> | Specifics of the team involved in the work                                                                | 13-14 |
| 22 |                 |                      |                                                                                                           |       |
| 23 | Study of the    | <a href="#">#09a</a> | Approach chosen for assessing the impact of the intervention(s)                                           | 11-15 |
| 24 |                 |                      |                                                                                                           |       |
| 25 | Intervention(s) |                      |                                                                                                           |       |
| 26 |                 |                      |                                                                                                           |       |
| 27 | Study of the    | <a href="#">#09b</a> | Approach used to establish whether the observed outcomes were due to the intervention(s)                  | 11?   |
| 28 |                 |                      |                                                                                                           |       |
| 29 | Intervention(s) |                      |                                                                                                           |       |
| 30 |                 |                      |                                                                                                           |       |
| 31 | Measures        | <a href="#">#10a</a> | Measures chosen for studying processes and outcomes of the intervention(s), including rationale for       | p13?  |
| 32 |                 |                      | choosing them, their operational definitions, and their validity and reliability                          |       |
| 33 |                 |                      |                                                                                                           |       |
| 34 | Measures        | <a href="#">#10b</a> | Description of the approach to the ongoing assessment of contextual elements that contributed to the      | 13    |
| 35 |                 |                      | success, failure, efficiency, and cost                                                                    |       |
| 36 |                 |                      |                                                                                                           |       |
| 37 |                 |                      |                                                                                                           |       |
| 38 | Measures        | <a href="#">#10c</a> | Methods employed for assessing completeness and accuracy of data                                          | 11-15 |
| 39 |                 |                      |                                                                                                           |       |
| 40 |                 |                      |                                                                                                           |       |
| 41 |                 |                      |                                                                                                           |       |
| 42 | Analysis        | <a href="#">#11a</a> | Qualitative and quantitative methods used to draw inferences from the data                                | 13-15 |
| 43 |                 |                      |                                                                                                           |       |
| 44 |                 |                      |                                                                                                           |       |
| 45 | Analysis        | <a href="#">#11b</a> | Methods for understanding variation within the data, including the effects of time as a variable          | 13-15 |
| 46 |                 |                      |                                                                                                           |       |
| 47 |                 |                      |                                                                                                           |       |
| 48 | Ethical         | <a href="#">#12</a>  | Ethical aspects of implementing and studying the intervention(s) and how they were addressed,             | 16    |
| 49 |                 |                      | including, but not limited to, formal ethics review and potential conflict(s) of interest                 |       |
| 50 | considerations  |                      |                                                                                                           |       |
| 51 |                 |                      |                                                                                                           |       |
| 52 |                 |                      |                                                                                                           |       |
| 53 |                 |                      |                                                                                                           |       |
| 54 | <b>Results</b>  |                      |                                                                                                           |       |
| 55 |                 |                      |                                                                                                           |       |
| 56 |                 |                      |                                                                                                           |       |
| 57 |                 |                      |                                                                                                           |       |
| 58 |                 |                      |                                                                                                           |       |
| 59 |                 |                      |                                                                                                           |       |
| 60 |                 |                      |                                                                                                           |       |

|    |                |                      |                                                                                                             |     |
|----|----------------|----------------------|-------------------------------------------------------------------------------------------------------------|-----|
| 1  |                | <a href="#">#13a</a> | Initial steps of the intervention(s) and their evolution over time (e.g., time-line diagram, flow chart, or | n/a |
| 2  |                |                      |                                                                                                             |     |
| 3  |                |                      | table), including modifications made to the intervention during the project                                 |     |
| 4  |                |                      |                                                                                                             |     |
| 5  |                | <a href="#">#13b</a> | Details of the process measures and outcome                                                                 | n/a |
| 6  |                |                      |                                                                                                             |     |
| 7  |                |                      |                                                                                                             |     |
| 8  |                | <a href="#">#13c</a> | Contextual elements that interacted with the intervention(s)                                                | n/a |
| 9  |                |                      |                                                                                                             |     |
| 10 |                |                      |                                                                                                             |     |
| 11 |                | <a href="#">#13d</a> | Observed associations between outcomes, interventions, and relevant contextual elements                     | n/a |
| 12 |                |                      |                                                                                                             |     |
| 13 |                | <a href="#">#13e</a> | Unintended consequences such as unexpected benefits, problems, failures, or costs associated with the       | n/a |
| 14 |                |                      |                                                                                                             |     |
| 15 |                |                      | intervention(s).                                                                                            |     |
| 16 |                |                      |                                                                                                             |     |
| 17 |                |                      |                                                                                                             |     |
| 18 |                | <a href="#">#13f</a> | Details about missing data                                                                                  | n/a |
| 19 |                |                      |                                                                                                             |     |
| 20 | Discussion     |                      |                                                                                                             |     |
| 21 |                |                      |                                                                                                             |     |
| 22 |                |                      |                                                                                                             |     |
| 23 | Summary        | <a href="#">#14a</a> | Key findings, including relevance to the rationale and specific aims                                        | n/a |
| 24 |                |                      |                                                                                                             |     |
| 25 |                |                      |                                                                                                             |     |
| 26 | Summary        | <a href="#">#14b</a> | Particular strengths of the project                                                                         | 3   |
| 27 |                |                      |                                                                                                             |     |
| 28 | Interpretation | <a href="#">#15a</a> | Nature of the association between the intervention(s) and the outcomes                                      | n/a |
| 29 |                |                      |                                                                                                             |     |
| 30 |                |                      |                                                                                                             |     |
| 31 | Interpretation | <a href="#">#15b</a> | Comparison of results with findings from other publications                                                 | n/a |
| 32 |                |                      |                                                                                                             |     |
| 33 |                |                      |                                                                                                             |     |
| 34 | Interpretation | <a href="#">#15c</a> | Impact of the project on people and systems                                                                 | n/a |
| 35 |                |                      |                                                                                                             |     |
| 36 | Interpretation | <a href="#">#15d</a> | Reasons for any differences between observed and anticipated outcomes, including the influence of           | n/a |
| 37 |                |                      |                                                                                                             |     |
| 38 |                |                      | context                                                                                                     |     |
| 39 |                |                      |                                                                                                             |     |
| 40 |                |                      |                                                                                                             |     |
| 41 | Interpretation | <a href="#">#15e</a> | Costs and strategic trade-offs, including opportunity costs                                                 | n/a |
| 42 |                |                      |                                                                                                             |     |
| 43 | Limitations    | <a href="#">#16a</a> | Limits to the generalizability of the work                                                                  | n/a |
| 44 |                |                      |                                                                                                             |     |
| 45 |                |                      |                                                                                                             |     |
| 46 | Limitations    | <a href="#">#16b</a> | Factors that might have limited internal validity such as confounding, bias, or imprecision in the design,  | n/a |
| 47 |                |                      |                                                                                                             |     |
| 48 |                |                      | methods, measurement, or analysis                                                                           |     |
| 49 |                |                      |                                                                                                             |     |
| 50 | Limitations    | <a href="#">#16c</a> | Efforts made to minimize and adjust for limitations                                                         | n/a |
| 51 |                |                      |                                                                                                             |     |
| 52 |                |                      |                                                                                                             |     |
| 53 | Conclusion     | <a href="#">#17a</a> | Usefulness of the work                                                                                      | 16  |
| 54 |                |                      |                                                                                                             |     |
| 55 |                |                      |                                                                                                             |     |
| 56 | Conclusion     | <a href="#">#17b</a> | Sustainability                                                                                              | n/a |
| 57 |                |                      |                                                                                                             |     |
| 58 | Conclusion     | <a href="#">#17c</a> | Potential for spread to other contexts                                                                      | 16  |
| 59 |                |                      |                                                                                                             |     |
| 60 |                |                      |                                                                                                             |     |

|    |                   |                      |                                                                                                       |     |
|----|-------------------|----------------------|-------------------------------------------------------------------------------------------------------|-----|
| 1  | Conclusion        | <a href="#">#17d</a> | Implications for practice and for further study in the field                                          | 16  |
| 2  |                   |                      |                                                                                                       |     |
| 3  |                   |                      |                                                                                                       |     |
| 4  | Conclusion        | <a href="#">#17e</a> | Suggested next steps                                                                                  | n/a |
| 5  |                   |                      |                                                                                                       |     |
| 6  | Other information |                      |                                                                                                       |     |
| 7  |                   |                      |                                                                                                       |     |
| 8  |                   |                      |                                                                                                       |     |
| 9  | Funding           | <a href="#">#18</a>  | Sources of funding that supported this work. Role, if any, of the funding organization in the design, | 17  |
| 10 |                   |                      |                                                                                                       |     |
| 11 |                   |                      | implementation, interpretation, and reporting                                                         |     |
| 12 |                   |                      |                                                                                                       |     |

13 None The SQUIRE 2.0 checklist is distributed under the terms of the Creative Commons Attribution License CC BY-NC 4.0. This checklist can be  
14 completed online using <https://www.goodreports.org/>, a tool made by the [EQUATOR Network](#) in collaboration with [Penelope.ai](#)  
15  
16  
17  
18  
19  
20  
21  
22  
23  
24  
25  
26  
27  
28  
29  
30  
31  
32  
33  
34  
35  
36  
37  
38  
39  
40  
41  
42  
43  
44  
45  
46  
47  
48  
49  
50  
51  
52  
53  
54  
55  
56  
57  
58  
59  
60

# BMJ Open

## Group Pregnancy Care for refugee background women: a co-designed, multi-method evaluation protocol applying a community engagement framework and an interrupted time series design

|                                 |                                                                                                                                                                                                                                                                                                                                                                                                                                                                                                                                                                                                                                                                                                                                                                                                                                                                                                                                                                                                                                                                                                                                                                                                                                                                                                                                                                                                                                                                                                                                                                                                                                                                                                                                                                             |
|---------------------------------|-----------------------------------------------------------------------------------------------------------------------------------------------------------------------------------------------------------------------------------------------------------------------------------------------------------------------------------------------------------------------------------------------------------------------------------------------------------------------------------------------------------------------------------------------------------------------------------------------------------------------------------------------------------------------------------------------------------------------------------------------------------------------------------------------------------------------------------------------------------------------------------------------------------------------------------------------------------------------------------------------------------------------------------------------------------------------------------------------------------------------------------------------------------------------------------------------------------------------------------------------------------------------------------------------------------------------------------------------------------------------------------------------------------------------------------------------------------------------------------------------------------------------------------------------------------------------------------------------------------------------------------------------------------------------------------------------------------------------------------------------------------------------------|
| Journal:                        | <i>BMJ Open</i>                                                                                                                                                                                                                                                                                                                                                                                                                                                                                                                                                                                                                                                                                                                                                                                                                                                                                                                                                                                                                                                                                                                                                                                                                                                                                                                                                                                                                                                                                                                                                                                                                                                                                                                                                             |
| Manuscript ID                   | bmjopen-2020-048271.R1                                                                                                                                                                                                                                                                                                                                                                                                                                                                                                                                                                                                                                                                                                                                                                                                                                                                                                                                                                                                                                                                                                                                                                                                                                                                                                                                                                                                                                                                                                                                                                                                                                                                                                                                                      |
| Article Type:                   | Protocol                                                                                                                                                                                                                                                                                                                                                                                                                                                                                                                                                                                                                                                                                                                                                                                                                                                                                                                                                                                                                                                                                                                                                                                                                                                                                                                                                                                                                                                                                                                                                                                                                                                                                                                                                                    |
| Date Submitted by the Author:   | 13-May-2021                                                                                                                                                                                                                                                                                                                                                                                                                                                                                                                                                                                                                                                                                                                                                                                                                                                                                                                                                                                                                                                                                                                                                                                                                                                                                                                                                                                                                                                                                                                                                                                                                                                                                                                                                                 |
| Complete List of Authors:       | Riggs, Elisha; Murdoch Childrens Research Institute, Intergenerational Health; The University of Melbourne, Department of General Practice<br>Yelland, Jane; Murdoch Childrens Research Institute, Intergenerational Health; The University of Melbourne, Department of General Practice<br>Mensah, Fiona; Murdoch Childrens Research Institute, Intergenerational Health; The University of Melbourne, Department of Paediatrics<br>Gold, Lisa; Deakin University, Deakin Health Economics; Murdoch Children's Research Institute, Population Health<br>szwarc, Josef; Victorian Foundation for Survivors of Torture<br>Kaplan, Ida ; Victorian Foundation for Survivors of Torture<br>Small, Rhonda; La Trobe University, Judith Lumely Centre; Karolinska Institute, Department of Women's and Children's Health, Division of Reproductive Health<br>Middleton, Philippa; South Australian Health and Medical Research Institute; The University of Adelaide, Faculty of Medical and Health Sciences<br>Krastev, Ann; Murdoch Childrens Research Institute, Intergenerational Health<br>Mcdonald, E; Murdoch Childrens Research Institute, Intergenerational Health<br>East, Christine ; La Trobe University, School of Nursing and Midwifery/Mercy Hospital for Women<br>Homer, Caroline ; Burnet Institute, Maternal, Child and Adolescent Health Program<br>Nesvadba , Natalija; Mercy Hospitals Victoria Ltd<br>Biggs, Laura; Murdoch Childrens Research Institute, Intergenerational Health<br>Braithwaite, Jeffrey; Macquarie University, Australian Institute of Health Innovation<br>Brown, Stephanie; Murdoch Childrens Research Institute, Intergenerational Health; The University of Melbourne, Department of General Practice and Department of Paediatrics |
| <b>Primary Subject Heading</b>: | Public health                                                                                                                                                                                                                                                                                                                                                                                                                                                                                                                                                                                                                                                                                                                                                                                                                                                                                                                                                                                                                                                                                                                                                                                                                                                                                                                                                                                                                                                                                                                                                                                                                                                                                                                                                               |
| Secondary Subject Heading:      | Health services research                                                                                                                                                                                                                                                                                                                                                                                                                                                                                                                                                                                                                                                                                                                                                                                                                                                                                                                                                                                                                                                                                                                                                                                                                                                                                                                                                                                                                                                                                                                                                                                                                                                                                                                                                    |

1  
2  
3  
4  
5  
6  
7  
8  
9  
10  
11  
12  
13  
14  
15  
16  
17  
18  
19  
20  
21  
22  
23  
24  
25  
26  
27  
28  
29  
30  
31  
32  
33  
34  
35  
36  
37  
38  
39  
40  
41  
42  
43  
44  
45  
46  
47  
48  
49  
50  
51  
52  
53  
54  
55  
56  
57  
58  
59  
60

|           |                                                                                                                           |
|-----------|---------------------------------------------------------------------------------------------------------------------------|
| Keywords: | Quality in health care < HEALTH SERVICES ADMINISTRATION & MANAGEMENT, PUBLIC HEALTH, Community child health < PAEDIATRICS |
|           |                                                                                                                           |

SCHOLARONE™  
Manuscripts



I, the Submitting Author has the right to grant and does grant on behalf of all authors of the Work (as defined in the below author licence), an exclusive licence and/or a non-exclusive licence for contributions from authors who are: i) UK Crown employees; ii) where BMJ has agreed a CC-BY licence shall apply, and/or iii) in accordance with the terms applicable for US Federal Government officers or employees acting as part of their official duties; on a worldwide, perpetual, irrevocable, royalty-free basis to BMJ Publishing Group Ltd ("BMJ") its licensees and where the relevant Journal is co-owned by BMJ to the co-owners of the Journal, to publish the Work in this journal and any other BMJ products and to exploit all rights, as set out in our [licence](#).

The Submitting Author accepts and understands that any supply made under these terms is made by BMJ to the Submitting Author unless you are acting as an employee on behalf of your employer or a postgraduate student of an affiliated institution which is paying any applicable article publishing charge ("APC") for Open Access articles. Where the Submitting Author wishes to make the Work available on an Open Access basis (and intends to pay the relevant APC), the terms of reuse of such Open Access shall be governed by a Creative Commons licence – details of these licences and which [Creative Commons](#) licence will apply to this Work are set out in our licence referred to above.

Other than as permitted in any relevant BMJ Author's Self Archiving Policies, I confirm this Work has not been accepted for publication elsewhere, is not being considered for publication elsewhere and does not duplicate material already published. I confirm all authors consent to publication of this Work and authorise the granting of this licence.

1  
2  
3  
4  
5  
6  
7  
8  
9  
10  
11  
12  
13  
14  
15  
16  
17  
18  
19  
20  
21  
22  
23  
24  
25  
26  
27  
28  
29  
30  
31  
32  
33  
34  
35  
36  
37  
38  
39  
40  
41  
42  
43  
44  
45  
46  
47  
48  
49  
50  
51  
52  
53  
54  
55  
56  
57  
58  
59  
60

**Group Pregnancy Care for refugee background women: a co-designed, multi-method evaluation protocol applying a community engagement framework and an interrupted time series design**

Elisha Riggs,<sup>1,2</sup> Jane Yelland,<sup>1,2</sup> Fiona Mensah,<sup>1,3</sup> Lisa Gold,<sup>4,5</sup> Josef Szwarc,<sup>6</sup> Ida Kaplan,<sup>6</sup> Rhonda Small,<sup>7,8</sup> Philippa Middleton<sup>9,10</sup> Ann Krastev,<sup>1</sup> Ellie McDonald,<sup>1</sup> Christine East,<sup>11</sup> Caroline Homer,<sup>12</sup> Natalija Nesvadba,<sup>13</sup> Laura Biggs,<sup>1</sup> Jeffrey Braithwaite,<sup>14</sup> Stephanie J Brown<sup>1, 2, 3, 9</sup>

1 Intergenerational Health, Murdoch Children's Research Institute, Parkville, Victoria Australia

2 Department of General Practice, The University of Melbourne, Carlton, Victoria, Australia

3 Department of Paediatrics, Parkville, The University of Melbourne, Victoria Australia

4 Deakin Health Economics, Institute for Health Transformation, School of Health and Social Development, Faculty of Health, Deakin University, Burwood, Victoria, Australia

5 Population Health, Murdoch Children's Research Institute, Parkville, Victoria Australia

6 The Victorian Foundation for Survivors of Torture, Brunswick, Victoria, Australia

7 Judith Lumely Centre, La Trobe University, Bundoora, Victoria, Australia

8 Department of Women's and Children's Health, Division of Reproductive Health, Karolinska Institute, Stockholm, Sweden

9 South Australian Health and Medical Research Institute, Women and Children's Hospital Adelaide, South Australia, Australia

10 Faculty of Medical and Health Sciences, The University of Adelaide, Adelaide, South Australia, Australia.

11 School of Nursing and Midwifery, La Trobe University/Mercy Hospital for Women, Bundoora, Victoria, Australia

12 Maternal, Child and Adolescent Health Program, Burnet Institute, Melbourne, Victoria, Australia

13 Mercy Hospitals Victoria Ltd, Werribee, Victoria, Australia

14 Australian Institute of Health Innovation, Centre for Healthcare Resilience and Implementation Science, Macquarie University, New South Wales, Australia

**Corresponding author:** Elisha Riggs, Intergenerational Health, Murdoch Children's Research Institute, Flemington Road, Parkville VIC Australia 3052 E: [elisha.riggs@mcri.edu.au](mailto:elisha.riggs@mcri.edu.au)

**Word count:** 5593



1  
2  
3 **Key words:** healthcare, public health, community child health, group pregnancy care, refugee,  
4 interrupted time series, community engagement, evaluation,  
5  
6  
7  
8  
9  
10  
11  
12  
13  
14  
15  
16  
17  
18  
19  
20  
21  
22  
23  
24  
25  
26  
27  
28  
29  
30  
31  
32  
33  
34  
35  
36  
37  
38  
39  
40  
41  
42  
43  
44  
45  
46  
47  
48  
49  
50  
51  
52  
53  
54  
55  
56  
57  
58  
59  
60

## Abstract

**Introduction** Pregnancy and early parenthood are key opportunities for interaction with health services and connecting to other families at the same life stage. Public antenatal care should be accessible to all, however barriers persist for families from refugee communities to access, navigate and optimise health care during pregnancy. Group Pregnancy Care is an innovative model of care co-designed with a community from a refugee background and other key stakeholders in Melbourne, Australia. Group Pregnancy Care aims to provide a culturally safe and supportive environment for women to participate in antenatal care in a language they understand, to improve health literacy and promote social connections and inclusion. This paper outlines Group Pregnancy Care and provides details of the evaluation framework.

**Methods and analysis** The evaluation uses community-based participatory research methods to engage stakeholders in co-design of evaluation methods. The study is being conducted across multiple sites and involves multiple phases, use of quantitative and qualitative methods, and an interrupted time series design. Process and cost effectiveness measures will be incorporated into quality improvement cycles. Evaluation measures will be developed using co-design and participatory principles informed by community and stakeholder engagement and will be piloted prior to implementation.

**Ethics and dissemination** Ethics approvals have been provided by all six relevant authorities. Study findings will be shared with communities and stakeholders via agreed pathways including community forums, partnership meetings, conferences, policy and practice briefs and journal articles. Dissemination activities will be developed using co-design and participatory principles.

### Strengths and limitations of this study

- The conceptual framework for Group Pregnancy Care is informed by recognition of the diverse experiences of families of refugee background and the need for trauma informed approaches in health and social care and research.
- The evaluation involves a comprehensive, multi-method evaluation framework including interrupted time series, process measures and cost effectiveness analysis.
- Partnerships and community engagement have informed the co-design of the evaluation methods.
- Capacity building and employment of refugee background staff is central to conduct the evaluation and to support women's participation.
- Staffing and resource constraints coupled with the COVID-19 pandemic have limited the capacity of health services to implement the intervention. Pandemic social distancing measures also limited the capacity to implement some elements of the evaluation.

## Introduction

The United Nations estimates there are approximately 70 million forcibly displaced people globally.<sup>1</sup> Each year, the Australian Government sets the number of visas that may be granted to those in humanitarian need. This quota has been around 13,750 places annually, with some variation. In 2017, an additional 12,000 places were provided for people displaced from Syria and Iraq. In the state of Victoria, Australia, 40% of all women giving birth in 2017 were born overseas, with the majority of migrant women coming from a country where English is not the main language.<sup>2</sup> This equates to over 31,000 women of non-English speaking background giving birth in Victoria each year. In Victoria's largest metropolitan maternity hospitals around 10% of all women giving birth are of refugee background.<sup>3</sup>

Women from refugee backgrounds have high rates of stillbirth and perinatal mortality.<sup>4,5</sup> They also have a high risk of physical, mental and social health problems related to experiences of hardship, stress, and experience of persistent disadvantage in the high-income countries in which they settle.<sup>6-8</sup> The loss of family members through death, detention or separation is common, with pervasive and long term consequences for mental health, family functioning and social cohesion.<sup>9,10</sup>

There is accumulating evidence that exposure to stress and trauma preceding, during, and after pregnancy contributes to a range of adverse outcomes (for example infants born preterm, small for gestational age or with low birthweight), with the potential to affect health across the life course.<sup>11-18</sup> Further, the psychological and social impacts of torture and other traumatic events can often be experienced intergenerationally.<sup>10,12,15</sup>

The provision of effective high quality care during pregnancy is critical for healthy mothers and babies.<sup>19</sup> Pregnancy care should provide an opportunity to identify and attend to potentially modifiable social risk factors (e.g. social isolation, stress, trauma, low health literacy, family violence, smoking).<sup>20-25</sup> However the evidence regarding the effectiveness of antenatal interventions addressing social risk factors is mixed. For example, Kiely et al found that a relatively brief psychosocial intervention in pregnancy resulted in a reduction of intimate partner violence (IPV) and improved pregnancy outcomes among African-American women.<sup>26</sup> In contrast, a systematic review pooling evidence from nine Randomised Controlled Trials (RCTs) evaluating pregnancy interventions for IPV concluded that stronger, high quality research evidence is needed to clarify which interventions should be adopted.<sup>27</sup>

Families of refugee background encounter significant barriers accessing and utilising public maternity services and early maternal and child health services.<sup>28,29</sup> Within these systems of care, failure to identify and address clinical and social risks for poor maternal and infant outcomes places mothers and unborn babies at significant risk of adverse outcomes.<sup>19,30</sup> Supporting women to develop health literacy by tailoring antenatal and postnatal care to address their specific needs for information and build social connections for support has been shown to improve both health care access and engagement, and to enhance women's ability to make health decisions for themselves and their children.<sup>31-33</sup>

In this paper, we outline the evaluation framework for an innovative model of Group Pregnancy Care (GPC) for women of refugee background that is currently being implemented in Melbourne, Australia. Group Pregnancy Care aims to provide a culturally safe and supportive environment for women to actively participate in their health care.<sup>34</sup> GPC aims to improve maternal and child health outcomes by increasing engagement with antenatal care,

1  
2  
3 providing early postnatal care, overcoming language and health literacy barriers and  
4 decreasing social isolation.  
5

### 6 ***Group Pregnancy Care for women and their families from a refugee background***

7  
8 The World Health Organization identified Group Pregnancy Care as having the potential to  
9 meet the complex needs of populations vulnerable to poor outcomes,<sup>19</sup> with the Australian  
10 antenatal care guidelines outlining the potential benefits to women from refugee  
11 backgrounds.<sup>35</sup> Group-based pregnancy models typically involve a midwife providing  
12 antenatal care and education to a number of women at the same time. The group setting  
13 provides a forum for sharing information and developing supportive social networks. The  
14 premise of the model is that women learn best from each other's experience, with facilitated  
15 discussion focusing on what women want to know.  
16  
17

18  
19 The evidence in this field is building, with studies indicating improvements in preterm birth  
20 and low birthweight,<sup>36</sup> maternal knowledge and patient satisfaction,<sup>37-39</sup> social support<sup>40</sup> and  
21 reduced costs of health care provision.<sup>41</sup> However, a Cochrane systematic review including  
22 four randomised and quasi-randomised controlled trials (n=2350, English speaking women)  
23 evaluating group antenatal care found no clear evidence of improvement in rates of preterm  
24 birth, low birthweight, small-for-gestational age infants or perinatal mortality comparing  
25 group based models of antenatal care with one to one antenatal care.<sup>42</sup> The authors  
26 concluded that the number of women included in the review was too small to provide  
27 adequate power for meaningful comparisons, and further research was needed. Since this  
28 review, there has been a rapid emergence of new evidence supporting group-based models  
29 of pregnancy care. A systematic overview of group prenatal care in high-risk populations  
30 identified a range of improved outcomes for women identified as having a 'high-risk'  
31 pregnancy.<sup>43</sup> This included a 33-41% decrease in preterm birth for low-income and African  
32 American women, and increased antenatal care attendance for women with opioid addiction,  
33 adolescents and low-income groups observed in a number of studies in the review. The  
34 purpose of this review was to summarise the state of the evidence, yet pooled analyses were  
35 not attempted. Other American studies involving African American and Medicaid (public  
36 health insurance in the USA) eligible women have identified a reduction in low birthweight,  
37 caesarean birth, low 5 minute Apgar scores, and neonatal intensive care unit admission for  
38 women who attended the group model compared to standard care.<sup>44-46</sup> However, none of  
39 these studies have specifically focussed on women from refugee backgrounds.  
40  
41  
42  
43  
44

### 45 ***Co-design and implementation of a new model of Group Pregnancy Care***

46  
47 All Australian residents have access to free pregnancy care at public hospitals, and from public  
48 maternal and child health (and other community health) services, and subsidised care from  
49 community-based general practitioners through Australia's universal public health insurance  
50 scheme (Medicare).<sup>47</sup> Three quarters of women in Australia give birth in a public hospital and  
51 around a quarter of women give birth in a private hospital.<sup>48</sup>  
52  
53

54 The *Bridging the Gap Partnership* (2014-2016) was a consortium comprising 13 agencies, who  
55 came together with a shared goal of reducing disparities in maternal and child health  
56 outcomes among families of refugee background living in Melbourne's south eastern and  
57 western suburbs. The Partnership implemented a series of quality improvement initiatives  
58 over a 4-year period.<sup>3 49</sup> One of these initiatives involved the co-design and piloting of Group  
59  
60

Pregnancy Care for Karen families (from Burma) living in an outer western region of Melbourne, Australia.<sup>34</sup> This was the first program of its kind in Australia, involving inter-agency collaboration between public maternity hospitals, refugee support services and publicly funded maternal and child health (MCH) services. The pilot was evaluated in 2016 and details of the co-design process and qualitative evaluation have been published elsewhere.<sup>34</sup>

The key elements of GPC are outlined in Table 1 and described on the study website.<sup>50</sup> In brief, the model involves multifaceted, culturally appropriate preventive and health promoting health care, information and support for women of refugee background during and after pregnancy in a community setting. The model of care is delivered by a multidisciplinary team of five staff. Fortnightly group information sessions are co-facilitated by a midwife, MCH nurse and bicultural worker. Clinical antenatal care is provided by a second midwife and an on-site interpreter alongside the group sessions. GPC is cost-free for clients; provides pregnancy care and information that is woman-directed, culturally appropriate and in women's language; and facilitates referrals, e.g. social work, housing services. Women can enrol to attend the fortnightly group information sessions at any stage of pregnancy.

**Table 1: Key elements of *Group Pregnancy Care* for refugee background women**

**Key elements:**

- Local partnerships between public maternity hospitals, maternal and child health services and multicultural agencies. Partnership meetings are held quarterly and both managers and staff are invited to attend.
- Community and stakeholder engagement in the co-design of each new local program. GPC is tailored to meet the needs of a specific cultural group
- Establishment of a multidisciplinary team including two midwives, a maternal and child health nurse, a professional interpreter and a community and language specific bicultural worker; with the same team delivering GPC each session, with designated back-up staff available if needed.
- Women are invited to participate by general practice referral, hospital booking or through community networks
- Women-directed group information sessions with women from early to late pregnancy, co-facilitated by a midwife, maternal and child health nurse and a bicultural worker
- Pregnancy care (as per standard hospital schedule of visits) with a midwife and professional interpreter held at the same time as the group information session
- Home visits by the same maternal and child health nurse and bicultural worker up to 4 months postpartum (if needed)
- Locating GPC in a community setting close to where families live (e.g. MCH centre)
- Flexibility to embed the model in ways that work for communities and health services.

Figure 1 outlines the program logic for GPC. GPC is underpinned by the Trauma Recovery Framework developed by the Victorian Foundation for Survivors of Torture (Foundation House).<sup>51</sup> The family context and promoting positive outcomes for the whole family are central to GPC. A fundamental premise of GPC is that by creating culturally safe places for

women to connect, access information and strengthen health literacy and self-efficacy, the key elements of GPC will contribute to improved birth and family health outcomes. We expect that GPC should be able to change individual behaviors (e.g. self-efficacy, health literacy). As outlined in figure 1, these determinants are on the pathway to improved birth and family health outcomes.

We have defined some key terms here:

**Self-efficacy** - refers to an individual's confidence in their ability to complete a task or achieve a goal or be able to cope with a given situation based on the skills they have and the circumstances they face.

**Health literacy** - is about how people access health and health care information, understand the information, and how they apply that information to their lives by making decisions and acting on it.

**Cultural safety** - seeks to achieve better care through being aware of cultural difference, giving consideration of power relationships, implementing reflective practice, and makes systems and organisations responsible to ensure that service environments are safe for everyone—regardless of their expressed or assumed culture.

[Insert Figure 1 about here]

Nineteen women participated in a qualitative evaluation of the GPC pilot. Results showed that that GPC provides a space for women to feel like they belong, connect with their community networks and find a sense of kinship, family and community in Melbourne.<sup>34</sup> A key finding was the pivotal role of the bicultural worker in leveraging her own community networks for women to find out about GPC, and enabling trust and understanding between healthcare providers. The bicultural worker also played a valuable role building the knowledge and skills of other team members in culturally appropriate and sensitive ways of working with women and families of refugee background.<sup>46</sup> Based on the positive findings of this preliminary evaluation, the Victorian Government supported scale-up and a robust evaluation across several sites.

## ***Scaling up Group Pregnancy Care***

### ***Partnership and governance***

The Murdoch Children's Research Institute (MCRI) is the lead agency and oversees the GPC study in partnership with Foundation House. Foundation House is the major state-wide provider of counselling and advocacy services for people of refugee background. Building on community, research and health service partnerships established by the Bridging the Gap Partnership, the Lead Investigator brought together a team of study investigators with expertise in refugee health, community engagement, perinatal mental health, midwifery, implementation science, biostatistics and health economics to oversee the evaluation. The original partnership expanded to include eight health services; two refugee agencies; and three Victorian government department and peak governmental bodies. In addition, Local Partnership Groups have been formed comprising key managers and staff from the services involved to oversee site-specific co-design and implementation.

### ***Partnerships for sustainability***

The context for implementing and evaluating GPC is complex. Each GPC site involves a public hospital with competing demands for acute care resources. The implementation of GPC requires substantial investment from all stakeholders into the partnership relationship. All aspects of design, system readiness and workforce development have been developed within the existing resources of each partner agency. The partner agencies have provided a substantial investment of time, energy and enthusiasm for trying out GPC to improve care and outcomes for refugee families. This approach was adopted as a strategy to support sustainability of GPC within health services.

Pressures on the health agencies taking part include rising birth rates and changing demographics (i.e. population growth, new refugee populations) in the regions served by participating hospitals, coupled with organisational restructuring and fluctuations in workforce supply. In addition, national and state refugee and asylum seeker health service eligibility policies compound the challenges for services in meeting the needs of women and families newly arrived in Australia. Despite these systemic challenges, the investment in partnerships is anticipated to promote direct and sustained translation into practice.<sup>52</sup>

### ***GPC staffing***

GPC staff (e.g. midwives, MCH nurses, bicultural workers, interpreters) have been identified by service managers or via internal Expression of Interest pathways. Bicultural workers were drawn from staff already employed by one of the partner agencies (Victorian Cooperative on Children's Services for Ethnic Groups, known as VICSEG New Futures). All GPC staff participated in tailored professional development provided by the Foundation House<sup>53</sup> and the Groupwork Centre.<sup>54</sup> Training included trauma-informed approaches to care,<sup>51</sup> skills development in group co-facilitation, creating group safety, self-care and reflective practice.

### ***Communities participating in Group Pregnancy Care***

The partner agencies committed to expanding GPC with four refugee background communities: Karen (from Burma), Afghan, Assyrian Chaldean (from Iraq and Syria) and Vietnamese communities. Priority for these populations was based on:

- (i) evidence of poor maternal, perinatal and child health outcomes and under utilisation/lack of engagement with services (based on service data);
- (ii) >100 births per annum in the country/language group at partner hospitals
- (iii) social risks within communities as identified by partner agencies (access issues, isolation, family violence, low health literacy, requirement for interpreters)

Drawing on learnings from the pilot study, women are invited to participate in Group Pregnancy Care when they book in for pregnancy care at the participating hospital or they may be referred through community/social networks and other health and social care services (e.g. GP clinics).

### ***Study Aims***

The specific aims of the evaluation are to:

- 1
- 2
- 3 1. Evaluate the effectiveness of GPC in improving timely access and engagement with
- 4 preventive health care
- 5
- 6 2. a) Identify attributes of GPC (i.e. frequency of attendance at the group sessions,
- 7 acceptability of GPC) that are associated with health care access and engagement and
- 8 improved maternal and child outcomes and b) monitor adverse maternal, perinatal and
- 9 infant health outcomes of women participating in GPC.
- 10
- 11 3. Examine mothers' progression in health literacy, social and emotional well-being and
- 12 experience of care associated with participation in GPC.
- 13
- 14 4. Estimate the potential cost-offsets from improved maternal and child health outcomes
- 15 relative to the costs of implementing GPC, and cost-effectiveness.
- 16
- 17
- 18

19 We hypothesise that GPC will increase access and engagement with prenatal care (primary  
20 outcome for evaluation), and that participation in GPC will result in subsequent changes in  
21 individual health behaviors (e.g. self-efficacy, health literacy) that are on the pathway to  
22 improved birth and maternal health outcomes.  
23

### 24 ***Study design and evaluation framework***

25 The evaluation framework has been developed using community-based participatory  
26 research methods to engage stakeholders in co-design of the evaluation methods. The study  
27 is being conducted across multiple sites and involves multiple phases, use of quantitative and  
28 qualitative methods, including an interrupted time series design. The time series design uses  
29 routinely collected hospital data to compare health service use and maternal and infant  
30 outcomes preceding and over the period of implementation of GPC.  
31

32 To explore GPC inputs and attributes, a prospective cohort of mothers participating in GPC  
33 across all sites is being recruited. Interviews are conducted at 30 weeks' gestation and at 4  
34 months postpartum. To further enhance understanding of scale-up and implementation, we  
35 are conducting focus groups with participating women and service providers implementing  
36 the model of care. Finally, an assessment of cost effectiveness of GPC is being undertaken  
37 (Figure 2).  
38

### 39 ***Scaling-up complex interventions***

40 Scaling 'up' and scaling 'out' is a challenging process and involves changing systems,  
41 institutions, policies, practices and the ethos of people, organisations and systems.<sup>55-57</sup> Not  
42 all elements are in the control of those wanting to implement the initiative. To determine  
43 what enables the capacity of systems to scale-up innovation (or not) requires a flexible and  
44 multi-faceted approach to evaluation. The Group Pregnancy Care study incorporates methods  
45 designed to answer questions that arise during implementation, enabling timely feedback to  
46 support scalability and sustainability.  
47

48 Our approach to scaling up draws upon implementation science, complexity theory and social  
49 science – that is, scale-up as structured improvement.<sup>57</sup> To study the ecological properties of  
50 GPC as a complex intervention<sup>58</sup> addressing socially determined health inequalities, multiple  
51 methods and data sources, including both qualitative and quantitative data are being used.  
52 Rather than demonstrating success of the scale-up of GPC by measuring fidelity of its  
53  
54  
55  
56  
57  
58  
59  
60



1  
2  
3 replication alone, we seek to generate a nuanced understanding of what changed during  
4 implementation, why and how. We will draw upon: 1) implementation science which takes a  
5 structured approach to developing, replicating and evaluating interventions in multiple sites;  
6 2) complexity science which encourages a flexible and adaptive approach to change in  
7 dynamic systems; and 3) social science which aims to consider why people act in the way they  
8 do, encompassing the organisational and wider social forces that shape and constrain  
9 people's actions.<sup>57</sup> These approaches will be used in combination to understand the  
10 challenges of spread and scale-up of a complex intervention. Our model of GPC as a complex  
11 intervention has been co-designed with each community, as we know that culturally adapting  
12 interventions can increase salience, acceptability and uptake.<sup>59</sup> Currently, there is insufficient  
13 evidence on the clinical effectiveness or cost-effectiveness of such an approach. We hope to  
14 contribute to this evidence base with learnings that can be translated to other settings, and  
15 more broadly, to policy and practice guidance.<sup>60</sup>

19  
20  
21 [Insert Figure 2 about here]

## 22 23 24 ***Methods and analysis***

### 25 26 27 ***Patient and Public (community) Involvement***

28  
29 The priorities of the study partner agencies and the experiences of the women participating  
30 in the pilot study have been critical to the design of this study, in particular the research  
31 questions, outcome measures and translation strategies. Study findings will be shared via  
32 bicultural researchers at Community Advisory Groups and presentations at community  
33 forums. The following sections details the community involvement in the conduct of all  
34 aspects of the evaluation.

35  
36 Partnerships, community engagement and capacity building underpin this study. For the  
37 past nine years MCRI and Foundation House have been working in partnership to develop  
38 and implement a program of collaborative, community-based, participatory research with  
39 refugee families focusing on social health and wellbeing of the whole family. Our  
40 commitment to respect, reciprocity and capacity building are fundamental to the way in  
41 which this study has been designed. Community engagement is a key strategy for ensuring  
42 that services are responsive to the needs of the communities which they serve.

43  
44 The employment of linguistically and culturally matched bicultural research staff and  
45 provision of mentoring and training to build research capacity are central to this study.  
46 Drawing upon the bicultural researchers' cultural knowledge, language skills and community  
47 networks is critical for establishing cultural safety.<sup>61</sup> These participatory strategies aim to  
48 alleviate the unequal relationships between researchers and research participants that  
49 characterise traditional research approaches.<sup>62</sup>

### 50 51 52 ***Role of bicultural researchers***

53  
54 In addition to the four bicultural staff appointed to work with GPC implementation teams,  
55 four bicultural researchers have been employed as part of the MCRI evaluation team. The  
56 bicultural researchers speak the language of the communities participating in GPC and have  
57 extensive community knowledge and networks to support consultation and other research  
58  
59  
60

1  
2  
3 activities. Specific training for the bicultural researchers has included: skills building in  
4 research activities (recruitment, informed consent, data collection, data security); processes  
5 for supporting participants experiencing distress; and opportunities to practice and receive  
6 feedback with research team members on facilitating discussion groups and conducting  
7 interviews.  
8  
9

### 10 ***Community Advisory Groups***

11 Following principles of cultural safety,<sup>61</sup> Community Advisory Groups (CAGs) have been  
12 established for each refugee community. Our previous research with refugee background  
13 communities has established effective community engagement methodologies involving the  
14 employment of bicultural staff and the establishment of Community Advisory Groups.<sup>63</sup> Our  
15 methodology is inclusive, flexible and aims to build capacity and support ongoing community  
16 participation.  
17  
18

19 Recruitment of Community Advisors was undertaken by the bicultural researchers, with  
20 support from partner agencies. The aim of the CAGs is to involve women (and men where  
21 appropriate) from refugee backgrounds with a range of experiences (e.g. new parents, Elders,  
22 religious leaders). Community consultation was conducted by the bicultural community  
23 researchers to identify appropriate community advisors. The CAGs meet at key points  
24 relevant to the evaluation. The role of community advisors has been to: (i) provide community  
25 perspectives to ensure the evaluation methods are appropriate and meaningful; (ii)  
26 contribute to problem solving, interpretation and dissemination of the evaluation findings;  
27 (iii) facilitate wider community engagement; and (iv) provide a conduit between the MCRI  
28 research team and the community.  
29  
30  
31

### 32 ***Setting***

33 We planned to evaluate seven GPC programs at four sites (in Melbourne Australia) involving  
34 six different refugee background communities (See Figure 3). The sites include public  
35 maternity hospitals and maternal and child health services in Melbourne's west, north and  
36 south east suburbs, all areas of high cultural diversity and increasing refugee settlement.  
37  
38  
39

40 [Insert Figure 3 about here]  
41  
42  
43

### 44 ***Effectiveness (Aim 1)***

#### 45 ***Data extraction from the Birthing Outcomes System***

46 To facilitate the interrupted time-series analysis, all partner hospitals are extracting data from  
47 the electronic Birthing Outcomes System (BOS) for all women giving birth at each site for a  
48 12-month period prior to commencement of GPC (baseline) and at 6 monthly intervals from  
49 implementation of GPC until completion. The BOS is a database collecting routine data  
50 including demographic information, service contact, screening results and maternal and  
51 neonatal outcomes (Table 2). We will categorise women according to whether they are  
52 Australian born or born overseas in an English-speaking country or non-English speaking  
53 country. In addition, we will identify all women from the cultural backgrounds of women  
54 participating in GPC, identified by county of birth and language spoken. Women enrolled in  
55 GPC will be identified in the BOS by a code in the data set.  
56  
57  
58  
59  
60

**Table 2 Data to be extracted from hospital Birthing Outcomes System****PRIMARY OUTCOME**

Number of women attending  $\geq 7$  antenatal clinic visits

**SECONDARY OUTCOMES**

**Pregnancy care:** First antenatal visit <14 weeks, ultrasound scan <14 weeks, number of visits with a professional interpreter involved, screening/diagnostic tests for gestational diabetes at < 30 weeks

**Maternal pregnancy medical conditions and complications:** hypertension, anaemia, pre-eclampsia, antepartum haemorrhage, gestational diabetes, threatened preterm labour, emergency department attendance

**Pregnancy and birth events:** induction of labour, method of birth, 3<sup>rd</sup> or 4<sup>th</sup> degree tear

**Maternal morbidity and mortality:** intrapartum or post-partum haemorrhage, wound infection, admission to intensive care, post-discharge readmission, maternal death

**Infant outcomes:** preterm birth (<37 weeks), low birthweight (<2500 grams), small/large for gestational age (<10<sup>th</sup>/90<sup>th</sup> centile), admission to neonatal/special care nursery for >12 hours, unplanned home birth, birth on way to hospital, stillbirth, neonatal death

**Covariates****Demographics**

Maternal country of birth, year of arrival in Australia, interpreter required, language(s) spoken, place of residence, maternal age at time of birth (years), relationship status

**Reproductive history:** parity; plurality; gravidity, pre-existing medical conditions

***Medical record data abstraction***

Non-routinely collected items such as referral pathways will be collected from the hospital records of women participating in GPC. Information will be abstracted on screening, referral and follow-up of medical and psychosocial issues, including: high blood pressure, gestational diabetes, suspected intra-uterine growth restriction, maternal mental health and family violence. Data collection will be undertaken by a research midwife following a protocol using a standardised form. De-identified data will be entered into the Research Electronic Data Capture (REDCap) online software.<sup>64</sup>

***Comparative study populations, sample size and study power***

Based on attendance at the GPC pilot, we anticipated that 4 sites would implement 7 GPC programs, providing an average of 74 women per group to participate in the evaluation. Allowing for an average loss of 4 women per group (5%), our projected comparison is based on a total sample size of 490 women participating over the period of provision of GPC. Comparisons will be made with i) 490 women receiving antenatal care in the 12 months

1  
2  
3 preceding introduction of GPC; and ii) 490 women contemporaneously enrolled in other  
4 models of care. These comparative populations will include women from the same  
5 cultural/language background receiving antenatal care at the same hospitals, selecting the  
6 most closely matched woman in regards to age and parity for each woman participating in  
7 GPC.  
8

9  
10 As the level of intragroup correlation in attendance is unknown but expected to be low, we  
11 will include an intra-class correlation in attendance by hospital for women not participating  
12 in GPC, ICC 0.001, and an ICC of 0.005 within groups for women participating in GPC. A level  
13 of 5% is considered significant for all comparisons. Using the hospital data as the basis for  
14 estimates, the comparisons would each provide 94% power to detect a minimum absolute  
15 difference in attendance at 7 or more antenatal visits of 10% (from the current 76% to 86%).  
16 Seven visits are considered the minimum for a healthy pregnancy without complications.<sup>35</sup>  
17  
18

### 19 ***Statistical analysis***

20  
21 i) All statistical analyses will be performed using STATA 15.<sup>65</sup> An interrupted time-series  
22 comparison<sup>66 67</sup> will be used to investigate the difference in the primary outcome - proportion  
23 of mothers attending the recommended number of antenatal visits - associated with the  
24 introduction of GPC. This comparison will be made using multilevel regression models  
25 accounting for clustering of mothers within hospitals/pregnancy groups, autocorrelation of  
26 the observed primary outcome over time and potential period effects (e.g. changes in the  
27 percentage of families of refugee background in the hospital service area). Models will thus  
28 include whether the timing of pregnancy was pre or post introduction of the GPC; and an  
29 additional item reflecting trend in antenatal attendance over the course of the evaluation to  
30 account for any contemporaneous patterns of attendance. Maternal characteristics specified  
31 *a priori* will be controlled for including: age; reproductive history and pregnancy  
32 complications (e.g. parity, prior preterm birth, prior stillbirth); gestation at GPC enrolment;  
33 country of birth; year of arrival; and other sociodemographic characteristics – this accounting  
34 for changes in the eligible population over the study period.  
35  
36  
37  
38  
39

40  
41 ii) Comparisons between women contemporaneously participating in GPC and other models  
42 of care will be conducted using congruent modelling strategies replacing the comparator of  
43 whether the timing of pregnancy was pre or post introduction of GPC with the comparator of  
44 participating in GPC versus other models of care.  
45  
46

### 47 ***Implementation (Aim 2)***

48  
49 We will use an approach to iterative, continuous quality improvement cycles called the Plan  
50 Do Study Act (PDSA) method<sup>68</sup>. This will involve collecting and analysing data and feeding it  
51 back to the Local Partnership Groups to refine GPC and continue to improve it.<sup>69</sup> This feedback  
52 aims to support and strengthen potential for intervention sustainability. The partnership  
53 adopted the PDSA framework as a pragmatic method for implementing and testing changes  
54 through small rapid cycles of improvement, with flexibility to adapt change according to  
55 feedback and engage GPC staff/managers in each PDSA cycle. The PDSA method aims to  
56 provide a supportive process to trial new ideas, allowing for small failures without compromising  
57 overall standards of care.  
58  
59  
60

1  
2  
3 Specifically, we will utilise the PDSA method to: (i) conduct an initial assessment of the key  
4 elements of the model from the perspective of women/families and staff taking part; (ii)  
5 identify barriers and enablers for implementation, and (iii) refine GPC elements and  
6 implement strategies to minimise barriers and maximise opportunities to achieve objectives.  
7 The researchers have used this method successfully in other maternity initiatives.<sup>70</sup> Three  
8 data sources will be used to gather data.  
9

10  
11  
12 1. Data will be abstracted from hospital records of women participating in GPC to inform  
13 improvement (as described above in Effectiveness).  
14

15  
16 2. Focus groups with women will be used to explore experiences of: GPC accessibility, content  
17 and relevance. A semi-structured discussion guide will be developed in consultation with the  
18 bicultural researchers. A purposive sample of 5-8 women from each GPC program who have  
19 completed the 16-week postpartum interview will be recruited (4 groups, n=20-30). Invited  
20 women will have a variety of experiences related to: time in Australia, English language  
21 fluency and group attendance. Focus groups will be conducted in women's preferred  
22 language co-facilitated by the MCRI bicultural researchers and will be audio recorded (with  
23 informed consent), transcribed verbatim, translated to English and analysed using thematic  
24 analysis.<sup>71</sup>  
25  
26

27  
28 3. Midwives, MCH nurses, interpreters, bicultural workers and management involved in  
29 delivery of the new model (n=35-45 participants) will be invited to participate in focus  
30 groups/interviews. Discussions will explore process evaluation measures including staff  
31 experiences of GPC implementation, cross-sector collaboration, capacity building, skill  
32 development, multidisciplinary teamwork, organisational and systems change, and  
33 sustainability.  
34  
35  
36

### 37 *Women's experiences (Aim 3)*

38  
39 All women enrolled in GPC will be invited to complete two interviews with a bicultural  
40 researcher at approximately 28-32 weeks' gestation and again 3-4 months postpartum. The  
41 MCRI bicultural researchers will recruit women and conduct the interviews.  
42

### 43 *Design and translation of structured interview*

44  
45 Standardised measures have been used where possible, and pre-tested to ensure cultural  
46 acceptability. All study materials were translated into required languages by a professional  
47 agency and with the assistance of the bicultural researchers, translated back into English to  
48 ensure high quality and accurate translations.<sup>72</sup> Maternal interviews will be audio recorded  
49 (with participant consent) and transcribed into English by bicultural staff.  
50  
51  
52  
53  
54  
55  
56  
57  
58  
59  
60

1  
2  
3 Parent mental health will be measured using the Hopkins Symptom Checklist and Harvard  
4 Trauma Questionnaire, developed for refugee populations.<sup>73</sup> Working with the MCRI  
5 bicultural researchers and the CAGs, we pilot tested the Edinburgh Postnatal Depression  
6 Scale,<sup>74 75</sup> and the Composite Abuse Scale<sup>76</sup> (measures experiences of physical and  
7 psychological abuse within intimate partner relationships) to determine acceptability, or not,  
8 by all communities participating in GPC. Other domains include: general demographics,  
9 health literacy, social connections and experiences of GPC.  
10  
11

### 12 ***Recruitment of prospective pregnancy cohort***

14 The bicultural researchers will attend the GPC site corresponding to their community and  
15 explain their role in the evaluation. Eligible women are enrolled in GPC and  $\geq 18$  years old.  
16 Women are not eligible to take part if they are too unwell to participate, have an intellectual  
17 disability or medical condition precluding them from giving informed consent (e.g. psychotic  
18 illness).  
19

21 Participant details will be stored on a REDCap database which produces a report based on  
22 women's estimated due date to notify the research team when a woman is due to be  
23 contacted to schedule the postnatal interview.  
24

### 25 ***Data Analysis***

27 After the completion of each interview, the bicultural researchers will transcribe the audio-  
28 recording to provide a comprehensive interview transcript in English. All data collected in the  
29 interview will be manually entered by research team staff into REDCap. Quantitative data will  
30 be exported to Stata 15 for scoring and analysis. Qualitative data will be exported to and  
31 managed in NVivo<sup>77</sup> for thematic analysis. Four steps for thematic data analysis will be  
32 followed: immersion, coding, categorising and developing themes.<sup>71</sup>  
33  
34  
35

### 36 ***Cost effectiveness (Aim 4)***

38 Data on resources used to deliver the intervention will be collected, including time  
39 commitments of paid staff and participating women. These will be valued (\$AUD) at standard  
40 unit costs (e.g. salary scales, interpreter costs, travel) to calculate intervention costs specific  
41 to each site. Intervention costs will be combined with potential cost-offsets and outcomes  
42 data (Table 2) in an economic evaluation that compares additional costs associated with GPC  
43 to changes in health outcomes (cost-consequences analysis).<sup>78</sup> Potential cost-offsets from  
44 improved maternal and child health outcomes will be estimated by partner hospitals based  
45 on routine perinatal data and hospital financial systems data on in-hospital care costs. As part  
46 of the qualitative data collection with GPC staff and stakeholders, information will be  
47 collected to inform the economic evaluation.  
48  
49  
50

### 51 ***Progress to date***

#### 52 ***Implementation of Group Pregnancy Care***

54 Planning for expansion of GPC to three new sites commenced in 2017. However, due to  
55 staffing and resource constraints at two of these sites, only the initial GPC pilot and one new  
56 GPC program remain part of the evaluation (involving the Karen and Assyrian Chaldean  
57 communities). Additional funding was secured in late 2019 to conduct consultation with two  
58  
59  
60

1  
2  
3 additional communities (Sudanese/South Sudanese and Iraqi/Syrian Muslim) with a view to  
4 establishing two new GPC programs to join the overall evaluation.  
5

### 6 ***Implications of COVID-19 pandemic***

7  
8 In response to the global COVID-19 pandemic, Australia initiated strict internal lockdown  
9 policies to reduce the risk of community transmission in late March 2020. As a result, the two  
10 established GPC programs paused provision of group sessions, and planning for the two new  
11 GPC programs was put on hold. The two established programs transitioned to virtual  
12 platforms for clinical and group-based information sessions from March 2020. Group sessions  
13 using an online platform were initiated in response to the ongoing need for women and  
14 families to connect to services and peers for information and support.  
15  
16

17 The evaluation has also continued, adapting to telephone/video interviews with women and  
18 staff/stakeholders. The abrupt disruption to GPC services flowing from the COVID-19  
19 pandemic mean the numbers of women participating in GPC and available for the interviews  
20 will be lower than planned.  
21

22 Given these circumstances, the intended sample size will not be achieved within the funded  
23 study period. At this point, interim analyses will be conducted and preliminary findings will  
24 be shared with the study partners and funders. Interim analyses will provide substantial  
25 outputs in regard to process and implementation learnings (Aim 2) and participant  
26 experiences (Aim 3) as well as preliminary exploration of responses in the primary outcome  
27 (proportion of women attending  $\geq 7$  antenatal clinic visits – Aim 1). Extension of the study with  
28 the two additional communities at the new sites for which funding has been secured plus  
29 continuation of GPC at the existing sites where feasible, will provide the opportunity to  
30 extend evaluation to achieve the intended sample size for the full comparisons (Aim 1) and  
31 economic evaluation (Aim 4).  
32  
33  
34

### 35 ***Ethics and dissemination***

#### 36 ***Ethical considerations***

37  
38 Human Research Ethics Committee (HREC) approvals have been provided by all six relevant  
39 authorities through the Australian National Mutual Acceptance scheme, where permitted.  
40 Ethical amendments were sought for each stage of the study following community and  
41 partner organisation consultation to finalise each stage. This staged approach enables piloting  
42 and reflection on the cultural safety<sup>61</sup> of the research activities and flexibility to refine  
43 research processes to ensure appropriateness and meaningfulness to community members,  
44 bicultural researchers and partners. At the time of submitting this protocol, HREC approval  
45 had been granted for all stages of the study with a modification for data abstraction pending  
46 at one hospital.  
47  
48  
49  
50

51 In Australia, there are specific ethical guidelines for conducting research with Aboriginal and  
52 Torres Strait Islander Communities.<sup>79</sup> However, an equivalent national approach to  
53 mandatory ethical research guidelines for the engagement of refugee background  
54 communities does not exist. We are mindful of the ethical issues to consider when conducting  
55 research with people of refugee background.<sup>80 81</sup> As the concepts of research and ethics may  
56 be unfamiliar to some participants, we acknowledge the possibility that participants may feel  
57 anxious about their involvement. Concerns may be provoked when issues such privacy, trust  
58 and confidentiality, audio recording of interviews etc. are not clear or comfortable for the  
59  
60

1  
2  
3 participant. The bicultural researchers will clarify the voluntary nature of research  
4 participation and encourage participants to ask questions to alleviate any concerns, as  
5 conducted in our previous research.<sup>63</sup> A study distress protocol developed in partnership with  
6 Foundation House and used in our previous research studies will guide the researchers in  
7 situations where participants become distressed, require support or disclose issues related to  
8 mental health, family violence or participant/child safety.  
9

10  
11 HREC approvals: The Royal Children's Hospital 37025, HREC/17/RCHM/66, MCRI  
12 SSA/17/RCHM/97, Monash Health 17-424X, HREC/16/MONH/65, SSA/17/MonH/362,  
13 Northern Health HREC/17/RCHM/66, SSA/17/NH/104, Western Health HREC/17/RCHM/66,  
14 SSA/AU/5/C@E0314, Mercy Health 2017-017, Victorian Department of Health and Human  
15 Services HHSD/19/174035.  
16  
17

### 18 ***Dissemination***

19  
20 We have developed a comprehensive knowledge translation and dissemination plan in line  
21 with our values of reciprocity and collaboration. Including: sharing study findings with  
22 communities in accessible ways (via bicultural researchers at Community Advisory Groups),  
23 presentations at community forums, partnership meetings, conferences, policy and practice  
24 briefs and publication of journal articles. All outputs will be available on the study website.  
25  
26

### 27 ***Authors' contributions***

28 ER is the study Principal Investigator and drafted this protocol based on the project proposal  
29 and other planning documents involving many people as outlined in the author contribution  
30 and acknowledgements. JY, FM, LG, JS, IK, RS, PM, CE, CH, JB and SB are study investigators  
31 and NN is a key stakeholder from a partner agency who have contributed to the study  
32 conceptualisation, development of the evaluation proposal and project planning. FM  
33 conducted sample size estimate calculations for the interrupted time series design. AK, EM,  
34 LB are employed on the project and have contributed to development of planning  
35 documents, conceptual framework, ethics submissions which involve many of the  
36 components outlined in this protocol, and drafting the manuscript. All authors contributed  
37 to drafting and finalising the manuscript.  
38  
39  
40  
41  
42

### 43 ***Funding***

44 This work is supported by the Victorian Government Department of Premier and Cabinet's  
45 Strategic Partnerships Metro - Capacity Building and Participation Program, the North  
46 Western Melbourne Primary Health Network and the Murdoch Children's Research Institute  
47 Population Health Theme. Research at the MCRI is supported by the Victorian Government's  
48 Operational Infrastructure Support Program. Jane Yelland was supported by a National Health  
49 and Medical Research Council (NHMRC) of Australia Translating Research into Practice  
50 Fellowship (1150566). Stephanie Brown was supported by a NHMRC Senior Research  
51 Fellowship (1103976). Fiona Mensah was supported by a NHMRC Career Development  
52 Fellowship (1111160).  
53  
54  
55

### 56 ***Competing interests***

57 None declared.  
58  
59

### 60 **Data availability statement**



1  
2  
3 Data sharing not applicable as no data sets generated and/or analysed for this study  
4

5 ***Participant consent for publication***  
6

7 Not required.  
8

9 ***Acknowledgements***  
10

11 We acknowledge and thank the many health and social care professionals, managers,  
12 administrators, and policy personnel engaged in Group Pregnancy Care in a myriad of ways.  
13 In particular, we would like to thank the Community Advisory Group members, the women  
14 and families participating in the Group Pregnancy Care study, Professor Jeremy Oats,  
15 Professor Louise Howard, Ms Donna Chesters, Ms Heidi Zwick, Ms Colleen Turner, Ms Janet  
16 Elefsiniotis, Ms Sayanti Bhatta, Ms Karen Diacono, Ms Pauline Petschel, Ms Ann McNair, Ms  
17 Catherine Fletcher, Ms Adele Mollo, Ms Elizabeth Murdoch, Sandra Papadopoullos and other  
18 key staff from Mercy Health (Werribee Mercy Hospital), Northern Health, Monash Health,  
19 Western Health, Wyndham City Council, Hume City Council, Brimbank City Council,  
20 Foundation House, VICSEG New Futures, the Groupwork Centre, and personnel at the  
21 Victorian Government Department of Health and Human Services and the Municipal  
22 Association of Victoria.  
23  
24  
25  
26  
27  
28  
29  
30  
31  
32  
33  
34  
35  
36  
37  
38  
39  
40  
41  
42  
43  
44  
45  
46  
47  
48  
49  
50  
51  
52  
53  
54  
55  
56  
57  
58  
59  
60

## References

1. UNHCR. Global Trends in Forced Displacement in 2018. Geneva, Switzerland: United Nations High Commissioner for Refugees, 2019.
2. Consultative Council on Obstetric and Paediatric Mortality and Morbidity. Victoria's Mothers, Babies and Children 2018. Melbourne, Victoria: Victorian Government, 2019.
3. Yelland J, Mensah F, Riggs E, et al. Evaluation of systems reform in public hospitals, Victoria, Australia, to improve access to antenatal care for women of refugee background: An interrupted time series design. *PLoS medicine* 2020;17(7):e1003089. doi: 10.1371/journal.pmed.1003089 [published Online First: 2020/07/11]
4. Drysdale H, Ranasinha S, Kendall A, et al. Ethnicity and the risk of late-pregnancy stillbirth. *Med J Aust* 2012;197(5):278-81. doi: 10.5694/mja12.10125
5. Gibson-Helm ME, Teede HJ, Cheng IH, et al. Maternal Health and Pregnancy Outcomes Comparing Migrant Women Born in Humanitarian and Nonhumanitarian Source Countries: A Retrospective, Observational Study. *Birth* 2015;42(2):116-24.
6. Porter M, Haslam N. Predisplacement and postdisplacement factors associated with mental health of refugees and internally displaced persons: A meta-analysis. *J Am Med Assoc* 2005;294(5):602-12.
7. Chen W, Hall BJ, Ling L, et al. Pre-migration and post-migration factors associated with mental health in humanitarian migrants in Australia and the moderation effect of post-migration stressors: findings from the first wave data of the BNLA cohort study. *The Lancet Psychiatry* 2017;4(3):218-29. doi: 10.1016/s2215-0366(17)30032-9
8. Beiser M. Resettling refugees and safeguarding their mental health: lessons learned from the Canadian Refugee Resettlement Project. *Transcult Psychiatry* 2009;46(4):539.
9. Fazel M, Reed RV, Panter-Brick C, et al. Review: Mental health of displaced and refugee children resettled in high-income countries: risk and protective factors. *The Lancet* 2012;379:266-82. doi: 10.1016/S0140-6736(11)60051-2
10. Wilmsen B. Family separation and the impacts on refugee settlement in Australia. *The Australian Journal of Social Issues* 2013;48(2):241.
11. Heslehurst N, Brown H, Pemu A, et al. Perinatal health outcomes and care among asylum seekers and refugees: a systematic review of systematic reviews. *BMC Med* 2018;16(1):89. doi: 10.1186/s12916-018-1064-0 [published Online First: 2018/06/13]
12. Sangalang CC, Vang C. Intergenerational Trauma in Refugee Families: A Systematic Review. *J Immigr Minor Health* 2017;19(3):745-54. doi: 10.1007/s10903-016-0499-7 [published Online First: 2016/09/24]
13. Kokou-Kpolou CK, Moukouta CS, Masson J, et al. Correlates of grief-related disorders and mental health outcomes among adult refugees exposed to trauma and bereavement: A systematic review and future research directions. *Journal of affective disorders* 2020;267:171-84. doi: 10.1016/j.jad.2020.02.026 [published Online First: 2020/03/29]
14. Heard-Garris NJ, Cale M, Camaj L, et al. Transmitting Trauma: A systematic review of vicarious racism and child health. *Social science & medicine (1982)* 2018;199:230-40. doi: 10.1016/j.socscimed.2017.04.018 [published Online First: 2017/05/01]
15. Steel Z, Chey T, Silove D, et al. Association of torture and other potentially traumatic events with mental health outcomes among populations exposed to mass conflict and displacement: a systematic review and meta-analysis. *JAMA* 2009;302 doi: 10.1001/jama.2009.1132
16. Garfin DR, Thompson RR, Holman EA. Acute stress and subsequent health outcomes: A systematic review. *Journal of psychosomatic research* 2018;112:107-13. doi: 10.1016/j.jpsychores.2018.05.017 [published Online First: 2018/08/12]

17. von Werthern M, Robjant K, Chui Z, et al. The impact of immigration detention on mental health: a systematic review. *BMC psychiatry* 2018;18(1):382. doi: 10.1186/s12888-018-1945-y [published Online First: 2018/12/14]
18. Kuh D, Ben-Shlomo Y. A life course approach to chronic disease epidemiology. 2nd ed. Oxford: Oxford University Press 2004.
19. World Health Organization. WHO recommendations on antenatal care for a positive pregnancy experience. Switzerland, 2016.
20. Kuzawa CW. Pregnancy as an intergenerational conduit of adversity: how nutritional and psychosocial stressors reflect different historical timescales of maternal experience. *Current Opinion in Behavioral Sciences* 2020;36:42-47. doi: <https://doi.org/10.1016/j.cobeha.2020.07.001>
21. McDonald S, Kehler H, Bayrampour H, et al. Risk and protective factors in early child development: Results from the All Our Babies (AOB) pregnancy cohort. *Research in developmental disabilities* 2016;58:20-30. doi: 10.1016/j.ridd.2016.08.010 [published Online First: 2016/09/03]
22. Olander EK, Smith DM, Darwin Z. Health behaviour and pregnancy: a time for change. *Journal of reproductive and infant psychology* 2018;36(1):1-3. doi: 10.1080/02646838.2018.1408965 [published Online First: 2018/03/09]
23. Vehmeijer FOL, Guxens M, Duijts L, et al. Maternal psychological distress during pregnancy and childhood health outcomes: a narrative review. *Journal of developmental origins of health and disease* 2019;10(3):274-85. doi: 10.1017/s2040174418000557 [published Online First: 2018/11/01]
24. Giallo R, Gartland D, Seymour M, et al. Maternal childhood abuse and children's emotional-behavioral difficulties: Intergenerational transmission via birth outcomes and psychosocial health. *Journal of family psychology : JFP : journal of the Division of Family Psychology of the American Psychological Association (Division 43)* 2020;34(1):112-21. doi: 10.1037/fam0000623 [published Online First: 2019/12/20]
25. Chamberlain C, O'Mara-Eves A, Porter J, et al. Psychosocial interventions for supporting women to stop smoking in pregnancy. *The Cochrane database of systematic reviews* 2017;2(2):Cd001055. doi: 10.1002/14651858.CD001055.pub5 [published Online First: 2017/02/15]
26. Kiely M, El-Mohandes AA, Gantz MG, et al. Understanding the association of biomedical, psychosocial and behavioral risks with adverse pregnancy outcomes among African-Americans in Washington, DC. *Maternal and child health journal* 2011;15 Suppl 1(Suppl 1):S85-95. doi: 10.1007/s10995-011-0856-z [published Online First: 2011/07/26]
27. Van Parys A-S, Verhamme A, Temmerman M, et al. Intimate partner violence and pregnancy: a systematic review of interventions. *PLoS One* 2014;9(1):e85084-e84. doi: 10.1371/journal.pone.0085084
28. Yelland J, Riggs E, Wahidi S, et al. How do Australian maternity and early childhood health services identify and respond to the settlement experience and social context of refugee background families? *BMC Pregnancy Childbirth* 2014;14(1):348. doi: 10.1186/1471-2393-14-348 [published Online First: 2014/10/07]
29. Riggs E, Davis E, Gibbs L, et al. Accessing maternal and child health services in Melbourne, Australia: reflections from refugee families and service providers. *BMC health services research* 2012;12:117. doi: 10.1186/1472-6963-12-117
30. Flenady V, Wojcieszek AM, Middleton P, et al. Stillbirths: recall to action in high-income countries. *Lancet (London, England)* 2016;387(10019):691-702. doi: 10.1016/s0140-6736(15)01020-x [published Online First: 2016/01/23]
31. Mobley S, Thomas S, Sutherland D, et al. Maternal Health Literacy Progression Among Rural Perinatal Women. *Maternal & Child Health Journal* 2014;18(8):1881-92. doi: 10.1007/s10995-014-1432-0

- 1
- 2
- 3
- 4 32. Carroll LN, Smith SA, Thomson NR. Parents as Teachers Health Literacy Demonstration Project:  
5 Integrating an Empowerment Model of Health Literacy Promotion Into Home-Based Parent  
6 Education. *Health Promotion Practice* 2015;16(2):282-90 9p. doi:  
7 10.1177/1524839914538968
- 8 33. Small R, Taft AJ, Brown SJ. The power of social connection and support in improving health:  
9 lessons from social support interventions with childbearing women. *BMC Public Health*  
10 2011;11 Suppl 5:S4. doi: 10.1186/1471-2458-11-S5-S4 [published Online First: 2011/12/30]
- 11 34. Riggs E, Muyeen S, Brown S, et al. Cultural safety and belonging for refugee background women  
12 attending group pregnancy care: An Australian qualitative study. *Birth* 2017;44(4):145-52.  
13 doi: 10.1111/birt.12272
- 14 35. Department of Health. Clinical Practice Guidelines: Pregnancy Care. Canberra, Australia:  
15 Australian Government Department of Health, 2018.
- 16 36. Cunningham SD, Lewis JB, Shebl FM, et al. Group prenatal care reduces risk of preterm birth and  
17 low birth weight: A matched cohort study. 2019;28(1):17-22.
- 18 37. Picklesimer A, Heberlein E, Covington-Kolb S. Group Prenatal Care: Has Its Time Come? *Clinical*  
19 *Obstetrics & Gynecology* 2015;58(2):380-91 12p. doi: 10.1097/GRF.0000000000000095
- 20 38. Hetherington E, Tough S, McNeil D, et al. Vulnerable Women's Perceptions of Individual Versus  
21 Group Prenatal Care: Results of a Cross-Sectional Survey. *Maternal and child health journal*  
22 2018;22(11):1632-38. doi: 10.1007/s10995-018-2559-1 [published Online First: 2018/06/24]
- 23 39. Liu R, Chao MT, Jostad-Laswell A, et al. Does CenteringPregnancy Group Prenatal Care Affect the  
24 Birth Experience of Underserved Women? A Mixed Methods Analysis. *J Immigr Minor Health*  
25 2017;19(2):415-22. doi: 10.1007/s10903-016-0371-9 [published Online First: 2016/03/05]
- 26 40. Chae SY, Chae MH, Kandula S, et al. Promoting improved social support and quality of life with  
27 the CenteringPregnancy(®) group model of prenatal care. *Archives of women's mental health*  
28 2017;20(1):209-20. doi: 10.1007/s00737-016-0698-1 [published Online First: 2016/12/19]
- 29 41. Cox R, Obichere R, Knoll F, et al. A study to compare productivity and cost of the  
30 CenteringPregnancy model of prenatal care with a traditional prenatal care model. Final  
31 Report to March of Dimes., 2006.
- 32 42. Catling CJ, Medley N, Foureur M, et al. Group versus conventional antenatal care for women. *The*  
33 *Cochrane database of systematic reviews* 2015;2:CD007622. doi:  
34 10.1002/14651858.CD007622.pub3
- 35 43. Byerley BM, Haas DM. A systematic overview of the literature regarding group prenatal care for  
36 high-risk pregnant women. *BMC Pregnancy Childbirth* 2017;17(1):329. doi: 10.1186/s12884-  
37 017-1522-2 [published Online First: 2017/10/01]
- 38 44. Carter EB, Barbier K, Sarabia R, et al. Group versus traditional prenatal care in low-risk women  
39 delivering at term: a retrospective cohort study. *Journal of perinatology : official journal of*  
40 *the California Perinatal Association* 2017;37(7):769-71. doi: 10.1038/jp.2017.33 [published  
41 Online First: 2017/03/31]
- 42 45. Abshire C, McDowell M, Crockett AH, et al. The Impact of CenteringPregnancy Group Prenatal  
43 Care on Birth Outcomes in Medicaid Eligible Women. *J Womens Health (Larchmt)*  
44 2019;28(7):919-28. doi: 10.1089/jwh.2018.7469 [published Online First: 2019/07/02]
- 45 46. Cunningham SD, Lewis JB, Shebl FM, et al. Group Prenatal Care Reduces Risk of Preterm Birth  
46 and Low Birth Weight: A Matched Cohort Study. *J Womens Health (Larchmt)* 2018 doi:  
47 10.1089/jwh.2017.6817 [published Online First: 2018/09/27]
- 48 47. Australian Government Department of Health. Medicare Canberra, Australia2020 [Available  
49 from: [www.health.gov.au/health-topics/medicare](http://www.health.gov.au/health-topics/medicare).]
- 50 48. Australian Institute Health and Welfare. Australia's mothers and babies 2018: in brief. Perinatal  
51 statistics series no. 36. Cat. no. PER 108. Canberra: AIHW, 2020.
- 52 49. Yelland J, Riggs E, Szwarc J, et al. Bridging the Gap: using an interrupted time series design to  
53 evaluate systems reform addressing refugee maternal and child health inequalities.
- 54
- 55
- 56
- 57
- 58
- 59
- 60

- 1  
2  
3  
4  
5  
6  
7  
8  
9  
10  
11  
12  
13  
14  
15  
16  
17  
18  
19  
20  
21  
22  
23  
24  
25  
26  
27  
28  
29  
30  
31  
32  
33  
34  
35  
36  
37  
38  
39  
40  
41  
42  
43  
44  
45  
46  
47  
48  
49  
50  
51  
52  
53  
54  
55  
56  
57  
58  
59  
60
- Implement Sci* 2015;10:62. doi: 10.1186/s13012-015-0251-z [published Online First: 2015/05/01]
50. Group Pregnancy Care Study. Group Pregnancy Care 2021 [Available from: <https://www.strongerfutures.org.au/group-pregnancy-care> accessed 18.06.21.
51. Victorian Foundation for Survivors of Torture. Rebuilding Shattered Lives. Melbourne, 1998.
52. Mitchell P, Pirkis J, Hall J, et al. Partnerships for knowledge exchange in health services research, policy and practice. *Journal of health services research & policy* 2009;14(2):104-11. doi: 10.1258/jhsrp.2008.008091
53. Victorian Foundation for Survivors of Torture. Professional Development: Training Melbourne2020 [Available from: [http://www.foundationhouse.org.au/professional\\_development/index.htm](http://www.foundationhouse.org.au/professional_development/index.htm).
54. Centre G. Workplace Training 2020 [Available from: <https://groupwork.com.au>.
55. Horton T, Illingworth J, W W. The Spread Challenge: how to support the successful uptake of innovations and improvements in health care. London, 2018.
56. Greenhalgh T, Wherton J, Papoutsis C, et al. Beyond Adoption: A New Framework for Theorizing and Evaluating Nonadoption, Abandonment, and Challenges to the Scale-Up, Spread, and Sustainability of Health and Care Technologies. *J Med Internet Res* 2017;(19(11):e367)
57. Greenhalgh T, Papoutsis C. Spreading and scaling up innovation and improvement. *BMJ* 2019;365:l2068. doi: 10.1136/bmj.l2068 [published Online First: 2019/05/12]
58. Greenhalgh T, Papoutsis C. Studying complexity in health services research: desperately seeking an overdue paradigm shift. *BMC Medicine* 2018;16(1):95. doi: 10.1186/s12916-018-1089-4
59. Liu J, Davidson E, Bhopal R, et al. Adapting health promotion interventions to meet the needs of ethnic minority groups: mixed-methods evidence synthesis. *Health Technol Assess* 2012;16(44):1-469. doi: 10.3310/hta16440
60. Tannahill C, Sridharan S. Getting real about policy and practice needs: evaluation as a bridge between the problem and solution space. *Evaluation and program planning* 2013;36(1):157-64. doi: 10.1016/j.evalprogplan.2012.03.002 [published Online First: 2012/04/07]
61. Curtis E, Jones R, Tipene-Leach D, et al. Why cultural safety rather than cultural competency is required to achieve health equity: a literature review and recommended definition. *International journal for equity in health* 2019;18(1):174. doi: 10.1186/s12939-019-1082-3 [published Online First: 2019/11/16]
62. Ellis BH, Kia-Keating M, Yusuf SA, et al. Ethical Research in Refugee Communities and the Use of Community Participatory Methods. *Transcult Psychiatry* 2007;44(3):459-81. doi: 10.1177/1363461507081642
63. Riggs E, Yelland J, Szwarc J, et al. Promoting the inclusion of Afghan women and men in research: reflections from research and community partners involved in implementing a 'proof of concept' project. *International journal for equity in health* 2015;14(1):13. doi: 10.1186/s12939-015-0145-3
64. Harris PA, Taylor R, Minor BL, et al. The REDCap consortium: Building an international community of software platform partners. *Journal of biomedical informatics* 2019;95:103208. doi: 10.1016/j.jbi.2019.103208 [published Online First: 2019/05/13]
65. StataCorp. Stata Statistical Software: Release 16. College Station, Texas: StatCorp LP, 2020.
66. Penfold RB, Zhang F. Use of interrupted time series analysis in evaluating health care quality improvements. *Academic pediatrics* 2013;13(6 Suppl):S38-44. doi: 10.1016/j.acap.2013.08.002 [published Online First: 2013/12/07]
67. Lopez Bernal J, Cummins S, Gasparrini A. The use of controls in interrupted time series studies of public health interventions. *International journal of epidemiology* 2018;47(6):2082-93. doi: 10.1093/ije/dyy135 [published Online First: 2018/07/10]
68. Langley G, Moen R, Nolan K, et al. The improvement guide: a practical approach to enhancing organizational performance. San Francisco CA: Jossey-Bass 2009.

- 1
- 2
- 3
- 4 69. Bisognano M, Cherouny PH, Gullo S. Applying a science-based method to improve perinatal care: the institute for healthcare improvement perinatal improvement community. *Obstetrics and gynecology* 2014;124(4):810-4. doi: 10.1097/AOG.0000000000000474
- 5
- 6
- 7 70. Yelland J, Biro MA, Dawson W, et al. Bridging the language gap: a co-designed quality improvement project to engage professional interpreters for women during labour. *Aust Health Rev* 2016 doi: 10.1071/AH16066
- 8
- 9
- 10 71. Green J, Willis K, Hughes E, et al. Generating best evidence from qualitative research: the role of data analysis. *Australian and New Zealand Journal of Public Health* 2007;31(6):545-50. doi: 10.1111/j.1753-6405.2007.00141.x [published Online First: 2007/12/18]
- 11
- 12
- 13 72. Small R, Yelland J, Lumley J, et al. Cross-cultural research: trying to do it better 2. Enhancing data quality. *Aust N Z J Public Health* 1999;23(4):390-95. doi: 10.1111/j.1467-842X.1999.tb01280.x
- 14
- 15
- 16 73. Mollica RF, Caspi-Yavin Y, Bollini P, et al. The Harvard Trauma Questionnaire: validating a cross-cultural instrument for measuring torture, trauma, and posttraumatic stress disorder in Indochinese refugees. 1992
- 17
- 18
- 19
- 20 74. Cox JL, Holden JM, Sagovsky R. Detection of postnatal depression: development of the 10-item Edinburgh Postnatal Depression Scale. *British Journal of Psychiatry* 1987;150:782-86.
- 21
- 22
- 23 75. Small R, Lumley J, Yelland J, et al. The performance of the Edinburgh Postnatal Depression Scale in English speaking and non-English speaking populations in Australia. *Soc Psychiatry Psychiatr Epidemiol* 2007;42(1):70-8. doi: 10.1007/s00127-006-0134-3 [published Online First: 2006/11/15]
- 24
- 25
- 26 76. Hegarty K, Fracgp, Bush R, et al. The composite abuse scale: further development and assessment of reliability and validity of a multidimensional partner abuse measure in clinical settings. *Violence and victims* 2005;20(5):529-47. [published Online First: 2005/10/27]
- 27
- 28
- 29
- 30 77. QSR International. NVivo 12 Plus. Version 12: QSR International Pty Ltd, 2018.
- 31
- 32 78. Drummond M, Sculpher M, Torrance G, et al. Methods for the economic evaluation of health care programmes. 3rd ed. UK: Oxford University Press 2005.
- 33
- 34 79. National Health and Medical Research Council. Ethical conduct in research with Aboriginal and Torres Strait Islander Peoples and communities: Guidelines for researchers and stakeholders. Canberra: Commonwealth of Australia, 2018.
- 35
- 36
- 37 80. Block K, Riggs E, Haslam NJV, et al. Values and vulnerabilities: The ethics of research with refugees and asylum seekers. 2013:xvii.
- 38
- 39 81. Mackenzie C, McDowell C, Pittaway E. Beyond 'do no harm': The challenge of constructing ethical relationships in refugee research. *Journal of Refugee Studies* 2007;20(2):299-319.
- 40
- 41
- 42
- 43
- 44
- 45
- 46
- 47
- 48
- 49
- 50
- 51
- 52
- 53
- 54
- 55
- 56
- 57
- 58
- 59
- 60

1  
2  
3 **Figure legends**  
4

5 **Figure 1 Conceptual model of Group Pregnancy Care to improve outcomes**  
6

7 **Figure 2 Evaluation overview**  
8

9 **Figure 3 Planned Sites for Group Pregnancy Care**  
10  
11  
12  
13  
14  
15  
16  
17  
18  
19  
20  
21  
22  
23  
24  
25  
26  
27  
28  
29  
30  
31  
32  
33  
34  
35  
36  
37  
38  
39  
40  
41  
42  
43  
44  
45  
46  
47  
48  
49  
50  
51  
52  
53  
54  
55  
56  
57  
58  
59  
60

1  
2  
3  
4  
5  
6  
7  
8  
9  
10  
11  
12  
13  
14  
15  
16  
17  
18  
19  
20  
21  
22  
23  
24  
25  
26  
27  
28  
29  
30  
31  
32  
33  
34  
35  
36  
37  
38  
39  
40  
41  
42  
43  
44  
45  
46  
47  
48  
49  
50  
51  
52  
53  
54  
55  
56  
57  
58  
59  
60

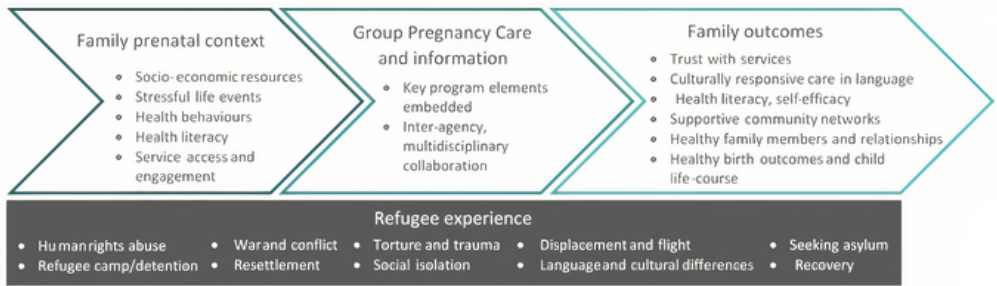

Figure 1 Conceptual model of Group Pregnancy Care to improve outcomes



|                                     |                                                                                                                                                             |
|-------------------------------------|-------------------------------------------------------------------------------------------------------------------------------------------------------------|
| Effectiveness<br><i>Aim 1</i>       | Method: Interrupted time-series using routinely collected hospital data supplemented by data on referral pathways obtained from hospital medical records    |
| Implementation<br><i>Aim 2</i>      | Method: Plan Do Study Act cycles, using 1) data from medical records 2) structured interviews with women 3) focus group with women, staff, and stakeholders |
| Women's Experiences<br><i>Aim 3</i> | Method: Community consultation and structured interviews with women                                                                                         |
| Cost Effectiveness<br><i>Aim 4</i>  | Method: Economic costings using data collected via staff/stakeholder interviews/focus groups                                                                |

Figure 2. Evaluation overview

1  
2  
3  
4  
5  
6  
7  
8  
9  
10  
11  
12  
13  
14  
15  
16  
17  
18  
19  
20  
21  
22  
23  
24  
25  
26  
27  
28  
29  
30  
31  
32  
33  
34  
35  
36  
37  
38  
39  
40  
41  
42  
43  
44  
45  
46  
47  
48  
49  
50  
51  
52  
53  
54  
55  
56  
57  
58  
59  
60

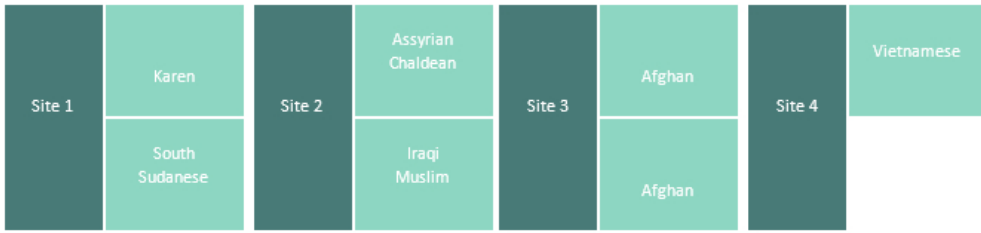

Figure 3. Planned Group Pregnancy Care Sites and Programs
